# Supplementary material for: Versioning biological cells for trustworthy cell engineering
Source: PubMed Central journal article supplement (PMC8828774; doi:10.1038/s41467-022-28350-4), 2022-02-09
Supplement: 41467_2022_28350_MOESM1_ESM.pdf [file 41467_2022_28350_MOESM1_ESM.pdf]

# Supplementary Information for

## Versioning Biological Cells for Trustworthy Cell Engineering

Jonathan Tellechea-Luzardo<sup>1+</sup>, Leanne Hobbs<sup>1+</sup>, Elena Velázquez<sup>2</sup>, Lenka Pelechova<sup>1</sup>, Simon Woods<sup>3</sup>, Victor de Lorenzo<sup>2</sup> and Natalio Krasnogor<sup>1\*</sup>.

### Affiliations:

<sup>1</sup>Interdisciplinary Computing and Complex Biosystems (ICOS) Research Group, Newcastle University, Newcastle Upon Tyne NE4 5TG, U.K.

<sup>2</sup>Systems and Synthetic Biology Program, Centro Nacional de Biotecnología (CNB-CSIC), 28049 Madrid, Spain.

<sup>3</sup> Policy Ethics and Life Sciences (PEALS), Newcastle University, Newcastle Upon Tyne NE1 7RU, U.K

\*Correspondence ([Natalio.Krasnogor@newcastle.ac.uk](mailto:Natalio.Krasnogor@newcastle.ac.uk))

<sup>+</sup> These authors contributed equally.

### This file includes:

Materials and Methods

Supplementary Figures 1 to 36

Supplementary Tables 1 to 13

## Materials and Methods

CellRepo can be accessed here: <https://cellrepo.ico2s.org>

### Detailed protocols

We present here all the step-by-step protocols in “card” format to ease the printing and understanding by CellRepo users.

All the barcoding procedures assume that the barcode has been already cloned into the barcode delivering plasmid and/or that the barcoding cassette has been amplified by PCR.

*E. coli* barcoding protocols

| <i>E. coli</i> $\lambda$ -Red recombineering |                                                                                                                                                                                                                                                                                                                                                                                                                                                                                                                                                                                                                                                                                                                                                                                                                                                                                                                                   |                                                                                    |
|----------------------------------------------|-----------------------------------------------------------------------------------------------------------------------------------------------------------------------------------------------------------------------------------------------------------------------------------------------------------------------------------------------------------------------------------------------------------------------------------------------------------------------------------------------------------------------------------------------------------------------------------------------------------------------------------------------------------------------------------------------------------------------------------------------------------------------------------------------------------------------------------------------------------------------------------------------------------------------------------|------------------------------------------------------------------------------------|
| Days to completion                           | Reference                                                                                                                                                                                                                                                                                                                                                                                                                                                                                                                                                                                                                                                                                                                                                                                                                                                                                                                         | QR to CellRepo example                                                             |
| 10                                           | 1                                                                                                                                                                                                                                                                                                                                                                                                                                                                                                                                                                                                                                                                                                                                                                                                                                                                                                                                 |  |
| Steps                                        |                                                                                                                                                                                                                                                                                                                                                                                                                                                                                                                                                                                                                                                                                                                                                                                                                                                                                                                                   |                                                                                    |
| Day 1                                        | 1. Start an overnight culture (37 °C) by inoculating LB medium with a single colony.                                                                                                                                                                                                                                                                                                                                                                                                                                                                                                                                                                                                                                                                                                                                                                                                                                              |                                                                                    |
| Day 2                                        | 2. Prepare competent cells following your favourite protocol.<br>3. Transform <i>E. coli</i> cells with plasmid pKD46 and plate the cells at 30 °C in LB supplemented with 100 µg/mL ampicillin (or carbenicillin).                                                                                                                                                                                                                                                                                                                                                                                                                                                                                                                                                                                                                                                                                                               |                                                                                    |
| Day 3                                        | 4. Start an overnight culture at 30 °C in LB/Amp from a single colony transformant.                                                                                                                                                                                                                                                                                                                                                                                                                                                                                                                                                                                                                                                                                                                                                                                                                                               |                                                                                    |
| Day 4                                        | 5. Next morning refresh the culture (1:100) with LB/Amp and grow the cells until OD <sub>600</sub> reaches 0.1.<br>6. Add arabinose to a final concentration of 30 mM and grow the cells to an OD <sub>600</sub> =0.5 (recombination proteins are being expressed at this point).<br>7. Freeze cells on ice for 20 minutes and prepare electrocompetent cells by washing bacteria with ice-cold milli-Q water after spinning aliquots 10 minutes at 5000 rpm in a 4 °C centrifuge.<br>8. After two washes, resuspend cells in the residual water and electroporate with 500 ng of the barcode DNA cassette (coming from the amplification of pEC-Red2-BC) with a Gene Pulser (25 µF, 200 Ω at 1.8 kV).<br>9. After electroporating the cells, add 950 µl of fresh LB without antibiotics to samples and resuspended cultures are grown for 2 hours at 37 °C.<br>10. Plate cells in LB supplemented with chloramphenicol 25 µg/mL. |                                                                                    |
| Day 5                                        | 11. Restreak colonies on LB/CM and grow overnight at 37°C.                                                                                                                                                                                                                                                                                                                                                                                                                                                                                                                                                                                                                                                                                                                                                                                                                                                                        |                                                                                    |
| Day 6                                        | 12. Perform PCR and sequencing experiments to confirm the insertion of the barcode.<br>13. To remove the antibiotic cassette, the pCP20 plasmid is transformed. Prepare liquid culture of cells containing the barcoding cassette in LB/Cam.                                                                                                                                                                                                                                                                                                                                                                                                                                                                                                                                                                                                                                                                                      |                                                                                    |
| Day 7                                        | 14. Prepare competent cells and transform pCP20 at 30 °C.<br>15. Plate in LB/Cam/Amp                                                                                                                                                                                                                                                                                                                                                                                                                                                                                                                                                                                                                                                                                                                                                                                                                                              |                                                                                    |
| Day 8                                        | 16. After pCP20 transformation, inoculate single colonies in LB/Amp/Cam and grow overnight at 30 °C.                                                                                                                                                                                                                                                                                                                                                                                                                                                                                                                                                                                                                                                                                                                                                                                                                              |                                                                                    |
| Day 9                                        | 17. Next morning, dilute cells in LB and grow at 30 °C until OD <sub>600</sub> reaches 0.1<br>18. Swap cells to 42 °C incubator and grow until OD <sub>600</sub> reaches 0.9.<br>19. Spot 30 µL in LB plate, streak over the plate and incubated at 37 °C.                                                                                                                                                                                                                                                                                                                                                                                                                                                                                                                                                                                                                                                                        |                                                                                    |
| Day 10                                       | 20. Barcode presence is checked again by PCR and sequencing.<br>21. Restreak single colonies in three different plates (LB, Cam and Amp) to check that the resistance is loss.                                                                                                                                                                                                                                                                                                                                                                                                                                                                                                                                                                                                                                                                                                                                                    |                                                                                    |

| <i>E. coli</i> CRISPR |                                                                                                                                                                                                                                                                                                                                                                                                                                                                                                                                                                                                                                                                                                                                                                                                                                              |                                                                                    |
|-----------------------|----------------------------------------------------------------------------------------------------------------------------------------------------------------------------------------------------------------------------------------------------------------------------------------------------------------------------------------------------------------------------------------------------------------------------------------------------------------------------------------------------------------------------------------------------------------------------------------------------------------------------------------------------------------------------------------------------------------------------------------------------------------------------------------------------------------------------------------------|------------------------------------------------------------------------------------|
| Days to completion    | Reference                                                                                                                                                                                                                                                                                                                                                                                                                                                                                                                                                                                                                                                                                                                                                                                                                                    | QR to CellRepo example                                                             |
| 8                     | 2                                                                                                                                                                                                                                                                                                                                                                                                                                                                                                                                                                                                                                                                                                                                                                                                                                            |  |
| Steps                 |                                                                                                                                                                                                                                                                                                                                                                                                                                                                                                                                                                                                                                                                                                                                                                                                                                              |                                                                                    |
| Day 1                 | 1. Start an overnight culture (37 °C) by inoculating LB medium from a single colony.                                                                                                                                                                                                                                                                                                                                                                                                                                                                                                                                                                                                                                                                                                                                                         |                                                                                    |
| Day 2                 | 2. Prepare competent cells following your favorite protocol.                                                                                                                                                                                                                                                                                                                                                                                                                                                                                                                                                                                                                                                                                                                                                                                 |                                                                                    |
| Day 2                 | 3. Transform <i>E. coli</i> cells with plasmid pREDCas9 and plate the cells at 30 °C in LB supplemented with 50 µg/mL spectinomycin.                                                                                                                                                                                                                                                                                                                                                                                                                                                                                                                                                                                                                                                                                                         |                                                                                    |
| Day 3                 | 4. Start an overnight culture at 30 °C in LB/Spec from a single colony.                                                                                                                                                                                                                                                                                                                                                                                                                                                                                                                                                                                                                                                                                                                                                                      |                                                                                    |
| Day 4                 | 5. Next morning refresh the culture with LB/Spec and grow the cells until OD600 reaches 0.1.<br>6. Add IPTG to a final concentration of 2 mM and grow the cells to an OD600 =0.6 (recombination proteins are being expressed at this point).<br>7. Frost cells on ice for 20 minutes and electrocompetent cells are then prepared by washing bacteria with ice-cold milliQ water after spinning aliquots 10 minutes at 5000 rpm in a 4 °C centrifuge. (Heat shock transformation also could be performed)<br>8. After two washes, resuspend cells in the residual milliQ water and electroporate with pEC-CRISPR2-BC.<br>9. Add 950 µl of fresh LB without antibiotics and resuspend cells. Incubate cells 1 hour at 30 °C.<br>10. Then, spread 100 µL of bacterial culture on LB plates supplemented with Spec (50 µg/mL) /Amp (100 µg/mL). |                                                                                    |
| Day 5                 | 11. Check colonies for barcode presence by colony-PCR.<br>12. Inoculate a positive clone in 2 mL of LB/Spec/Ara (30 mM) (sgRNA targeting pUC origin in pEC-CRISPR2-BC is expressed).<br>13. Grow for 4-6 hours.<br>14. Plate on LB/Spec.                                                                                                                                                                                                                                                                                                                                                                                                                                                                                                                                                                                                     |                                                                                    |
| Day 6                 | 15. Check some colonies for Ampicillin resistance by restreaking them on LB/Amp.                                                                                                                                                                                                                                                                                                                                                                                                                                                                                                                                                                                                                                                                                                                                                             |                                                                                    |
| Day 7                 | 16. Take a sensitive clone and restreak it on LB plates at 37°C.                                                                                                                                                                                                                                                                                                                                                                                                                                                                                                                                                                                                                                                                                                                                                                             |                                                                                    |
| Day 8                 | 17. Check again by colony PCR the presence of the barcode and restreak on LB/Spec and LB/Amp plates to double check plasmid curing.                                                                                                                                                                                                                                                                                                                                                                                                                                                                                                                                                                                                                                                                                                          |                                                                                    |

Note: Different sgRNA sequences were used in different experiments (obtained using <sup>3</sup>):

- Final sgRNA1: 5' - promoter – ATTCCGCGTAAGTATCGCGG– scaffold – terminator 3'
- Final sgRNA2: 5' - promoter – CGTACAAAAGTACGTGAGGA– scaffold – terminator 3'

## ***B. subtilis* barcoding protocols**

The toxin-antibiotic cassette assembly was achieved by HiFi assembly (NEB) of all the parts. The final product was PCR amplified and transformed into 168 cells.

| <b><i>B. subtilis</i> mazF toxin mediated barcoding</b> |                                                                                                                                                                                                                                                                                                                                                                                                                                                                |                                                                                    |
|---------------------------------------------------------|----------------------------------------------------------------------------------------------------------------------------------------------------------------------------------------------------------------------------------------------------------------------------------------------------------------------------------------------------------------------------------------------------------------------------------------------------------------|------------------------------------------------------------------------------------|
| <b>Days to completion</b>                               | <b>Reference</b>                                                                                                                                                                                                                                                                                                                                                                                                                                               | <b>QR to CellRepo example</b>                                                      |
| 6                                                       | 4                                                                                                                                                                                                                                                                                                                                                                                                                                                              |  |
| <b>Steps</b>                                            |                                                                                                                                                                                                                                                                                                                                                                                                                                                                |                                                                                    |
| Day 1                                                   | 1. Inoculate <i>B. subtilis</i> cells from a single colony overnight at 37 °C in minimal medium (MM: 10 ml SMM basic salts, 125 µl 40 % (w/v) glucose, 100 µl 2 % (w/v) tryptophan, 60 µl 1 M Mg2SO4*7H2O, 10 µl 20 % (w/v) casamino acids, 5 µl 2.2 mg/ml ferric ammonium citrate)                                                                                                                                                                            |                                                                                    |
| Day 2                                                   | 2. In the morning, dilute cells 1:100 in MM and incubate for 3 h at 37 °C.<br>3. Dilute 1:2 in SM (SM: 10 ml SMM basic salts, 125 µl 40 % (w/v) glucose, 60 µl 1 M Mg2SO4*7H2O). Incubate 2 h at 37 °C.<br>4. Mix 400 µL of cells with 1µg of barcode DNA cassette coming from the PCR amplification of the HiFi assembly of all the parts. Incubate 1 h at 37 °C.<br>5. Plate cells on NA supplemented Zeocin (20 µg/mL) plates. Incubate overnight at 37 °C. |                                                                                    |
| Day 3                                                   | 6. Check integration by colony PCR.<br>7. Incubate overnight one positive clone at 37 °C in LB/0.4% (w/v) glucose/zeocin.                                                                                                                                                                                                                                                                                                                                      |                                                                                    |
| Day 4                                                   | 8. Dilute the culture to OD600=0.1 in fresh LB/O.4% (w/v) glucose without antibiotics and grow to OD600=0.4.<br>9. Add 1 % (w/v) xylose. Incubate 8 h at 37 °C.                                                                                                                                                                                                                                                                                                |                                                                                    |
| Day 5                                                   | 10. Plate cells on NA supplemented with 1 % (w/v) xylose.                                                                                                                                                                                                                                                                                                                                                                                                      |                                                                                    |
| Day 6                                                   | 11. Restreak individual colonies on NA and NA/Zeoicin and colony-PCR to test for cassette removal.                                                                                                                                                                                                                                                                                                                                                             |                                                                                    |

| <i>B. subtilis</i> Cre-Lox |                                                                                                                                                                                                                                                                                                                                                                                                                                                       |                                                                                    |
|----------------------------|-------------------------------------------------------------------------------------------------------------------------------------------------------------------------------------------------------------------------------------------------------------------------------------------------------------------------------------------------------------------------------------------------------------------------------------------------------|------------------------------------------------------------------------------------|
| Days to completion         | Reference                                                                                                                                                                                                                                                                                                                                                                                                                                             | QR to CellRepo example                                                             |
| 6                          | 5                                                                                                                                                                                                                                                                                                                                                                                                                                                     |  |
| Steps                      |                                                                                                                                                                                                                                                                                                                                                                                                                                                       |                                                                                    |
| Day 1                      | 1. Start an overnight culture 37 °C in minimal medium.                                                                                                                                                                                                                                                                                                                                                                                                |                                                                                    |
| Day 2                      | 2. Dilute cells 1:10 in MM and grown for 3 h at 37 °C. Meanwhile, SM is prepared and prewarmed at 37 °C.<br>3. Dilute in 1:2 SM and make competent cells with a further 2 h incubation period at 37 °C.<br>4. 400 µL cell aliquots are mixed with 1 µg recombinant DNA PCR (coming from the amplification of pBS-CreLox-BC). Incubate 1 h at 37 °C.<br>5. Cells are spun down, concentrated and plated on NA/Zeocin (20 µg/mL) and incubated at 37°C. |                                                                                    |
| Day 3                      | 6. Colonies are tested for the integration of the recombinant DNA by PCR and sequencing.<br>7. Grow a positive clone overnight at 37 °C in MM.                                                                                                                                                                                                                                                                                                        |                                                                                    |
| Day 4                      | 8. Dilute cells 1:10 in MM and grown for 3h at 37°C. Meanwhile, SM is prepared and prewarmed at 37 °C.<br>9. The culture is diluted 1:2 in SM and cells are made competent with a further 3 h incubation period at 37 °C.<br>10. 400 µl cell aliquots are mixed with 100 ng pDR244.<br>11. Cells are spun down, concentrated and plated on LB supplemented with spectinomycin (100 µg/mL) and incubated at 30 °C.                                     |                                                                                    |
| Day 5                      | 12. Check selection cassette removal by colony PCR.<br>13. Positive clones are plated on NA/Zeocin (to check ABR loss) and on LB at 37 °C to cure pDR244.                                                                                                                                                                                                                                                                                             |                                                                                    |
| Day 6                      | 14. Check pDR244 curation by plating cells on LB/Spec.                                                                                                                                                                                                                                                                                                                                                                                                |                                                                                    |

| <i>B. subtilis</i> CRISPR |                                                                                                                                                                                                                                                                                                                                                                                             |                                                                                    |
|---------------------------|---------------------------------------------------------------------------------------------------------------------------------------------------------------------------------------------------------------------------------------------------------------------------------------------------------------------------------------------------------------------------------------------|------------------------------------------------------------------------------------|
| Days to completion        | Reference                                                                                                                                                                                                                                                                                                                                                                                   | QR to CellRepo example                                                             |
| 4                         | 6                                                                                                                                                                                                                                                                                                                                                                                           |  |
| Steps                     |                                                                                                                                                                                                                                                                                                                                                                                             |                                                                                    |
| Day 1                     | 1. Start an overnight culture 37 °C in minimal medium.                                                                                                                                                                                                                                                                                                                                      |                                                                                    |
| Day 2                     | 2. Dilute cells 1:10 in MM and grown for 3 h at 37 °C. Meanwhile, starvation medium is prepared and prewarmed at 37 °C.<br>3. Dilute in 1:2 SM and make competent cells with a further 2 h incubation period at 37 °C.<br>4. Mix 400 µl cell with 400 ng pBS-CRISPR-BC. Spin down cells and plate on LB supplemented with 5 µg/mL kanamycin and 0.2% mannose and incubate at 30 °C for 1 h. |                                                                                    |
| Day 3                     | 5. Check barcode presence by colony-PCR.<br>6. Cure positive clones from pBS-CRISPR-BC by restreaking them at 37 °C in LB plates.                                                                                                                                                                                                                                                           |                                                                                    |
| Day 4                     | 7. Store kanamycin sensitive clones as barcoded.                                                                                                                                                                                                                                                                                                                                            |                                                                                    |

Final sgRNA: 5' - promoter – GGAAAAGAGTATATTAGATA – scaffold – terminator 3'.  
sgRNA sequences obtained using <sup>3</sup>.

### *P. putida* barcoding protocol

The barcoding protocol using TargeTron was adapted from *E. coli*<sup>8</sup> to *P. putida*<sup>9</sup>. The barcode sequence was synthesized by PCR with two overlapping oligonucleotides. Afterwards, this PCR fragment was directly cloned into MluI-digested pSEVA6511-GIII by Gibson Assembly to generate pSEVA6511-GIII-BC. The generation of pSEVA231-C-94a is explained elsewhere<sup>10</sup>. Details on how the TargeTron system works as a barcode deliverer in *P. putida* can be found in Supplementary Fig. 3. After generating these two plasmids, the barcoding protocol was carried out as follows:

| <i>P. putida</i> CRISPR/targetron |                                                                                                                                                                                                                                                                                                                                                                                                                                                                                                                                                                                                                                                                                                                                                                                                                                                                                                                                                                                                                                                                                                                                                                                                                                                                                                                                                                                                                                                            |                                                                                    |
|-----------------------------------|------------------------------------------------------------------------------------------------------------------------------------------------------------------------------------------------------------------------------------------------------------------------------------------------------------------------------------------------------------------------------------------------------------------------------------------------------------------------------------------------------------------------------------------------------------------------------------------------------------------------------------------------------------------------------------------------------------------------------------------------------------------------------------------------------------------------------------------------------------------------------------------------------------------------------------------------------------------------------------------------------------------------------------------------------------------------------------------------------------------------------------------------------------------------------------------------------------------------------------------------------------------------------------------------------------------------------------------------------------------------------------------------------------------------------------------------------------|------------------------------------------------------------------------------------|
| Days to completion                | Reference                                                                                                                                                                                                                                                                                                                                                                                                                                                                                                                                                                                                                                                                                                                                                                                                                                                                                                                                                                                                                                                                                                                                                                                                                                                                                                                                                                                                                                                  | QR to CellRepo example                                                             |
| 7                                 | 9                                                                                                                                                                                                                                                                                                                                                                                                                                                                                                                                                                                                                                                                                                                                                                                                                                                                                                                                                                                                                                                                                                                                                                                                                                                                                                                                                                                                                                                          |  |
| Steps                             |                                                                                                                                                                                                                                                                                                                                                                                                                                                                                                                                                                                                                                                                                                                                                                                                                                                                                                                                                                                                                                                                                                                                                                                                                                                                                                                                                                                                                                                            |                                                                                    |
| Day 1                             | 1. Start an overnight culture (30° C) by inoculating LB medium from a single colony.                                                                                                                                                                                                                                                                                                                                                                                                                                                                                                                                                                                                                                                                                                                                                                                                                                                                                                                                                                                                                                                                                                                                                                                                                                                                                                                                                                       |                                                                                    |
| Day 2                             | 2. Transform plasmid pSEVA421-Cas9tr into <i>P. putida</i> strain either by electroporation <sup>11</sup> or conjugation <sup>12</sup> : <ul style="list-style-type: none"> <li>○ <u>Electroporation</u>: Briefly, wash an overnight culture with 300mM sucrose at room temperature four times. At the end, resuspend pellet in 400 µL of sucrose and separate in 100 µL aliquots. After adding 100 ng of pSEVA421-Cas9tr to one aliquot, carry out the electrical shock (program in Gene Pulser from Bio-Rad: 2.5 kV, 25 µF, 200 Ω.) and plate on LB supplemented with streptomycin (100 µg/mL).</li> <li>○ <u>Conjugation</u>: Tri-parental mating can be performed for the mobilization of pSEVA plasmids from <i>E. coli</i> to <i>P. putida</i> strains. Briefly, take 1 mL from overnight cultures of donor (<i>E. coli</i> strain bearing pSEVA421-Cas9tr), helper (in our case, <i>E. coli</i> HB101 with plasmid pRK600) and recipient <i>P. putida</i> strain. Spin down cells and wash once with 10mM MgSO<sub>4</sub>. Mix 100 µL from each washed culture and spin down cells to eliminate the supernatant. Finally, resuspend the final pellet in 20 µL of MgSO<sub>4</sub> and spot on a LB agar plate. When dry, incubate for at least 4h at 30°C and then, recuperate cells, resuspend them on MgSO<sub>4</sub> and plate serial dilution on M9 minimal media supplemented with sodium citrate at 0.2% (w/v) and streptomycin.</li> </ul> |                                                                                    |
| Day 3                             | 3. Select single colonies resistant to streptomycin and start a new culture.                                                                                                                                                                                                                                                                                                                                                                                                                                                                                                                                                                                                                                                                                                                                                                                                                                                                                                                                                                                                                                                                                                                                                                                                                                                                                                                                                                               |                                                                                    |
| Day 4                             | 4. Transform plasmid pSEVA6511-GIII-BC by following one of the same two procedures described above.                                                                                                                                                                                                                                                                                                                                                                                                                                                                                                                                                                                                                                                                                                                                                                                                                                                                                                                                                                                                                                                                                                                                                                                                                                                                                                                                                        |                                                                                    |
| Day 5                             | 5. Select single colonies resistant to streptomycin and gentamycin (15 µg/mL)<br>6. Start a new culture (20 mL of LB supplemented with streptomycin and gentamycin is recommended)                                                                                                                                                                                                                                                                                                                                                                                                                                                                                                                                                                                                                                                                                                                                                                                                                                                                                                                                                                                                                                                                                                                                                                                                                                                                         |                                                                                    |
| Day 6                             | 7. Induce the overnight culture with 1mM cyclohexanone for 4h at 30° C<br>8. Make competent cells by following the procedure explained before Electroporate 100 ng of pSEVA231-C-94a into one aliquot of competent cells and recover the culture for 2 h in LB supplemented with streptomycin.<br>9. Plate the cells on LB plates supplemented with streptomycin and kanamycin (50 µg/mL).                                                                                                                                                                                                                                                                                                                                                                                                                                                                                                                                                                                                                                                                                                                                                                                                                                                                                                                                                                                                                                                                 |                                                                                    |
| Day 7                             | 10. Check by PCR the presence of the barcode at the correct locus and start giving passages with no antibiotic selection to cure plasmids.                                                                                                                                                                                                                                                                                                                                                                                                                                                                                                                                                                                                                                                                                                                                                                                                                                                                                                                                                                                                                                                                                                                                                                                                                                                                                                                 |                                                                                    |



## *S. albidoflavus* barcoding protocol

pCRISPomyces-2 vector was used to engineer *S. albidoflavus* J1074. Using the vector construction protocol detailed in<sup>13</sup>, pSA-CRISPR vector was built (testing two different sgRNA sequences). By Hi-Fi assembly, the barcode sequence was cloned. To transform this vector into *S. albidoflavus* J1074, the protocol detailed in<sup>14</sup> was followed. pCRISPomyces-2 was a gift from Huimin Zhao (Addgene plasmid # 61737).

Note: Two sgRNA sequences used (obtained using<sup>5</sup>):

- ⇒ sgRNA1: 5' - promoter – TCATCGTTCTCAATACACCG– scaffold – terminator 3'
- ⇒ sgRNA2: 5' - promoter – TGCAACCTCCGTGATCATTC– scaffold – terminator 3'

| <i>S. albidoflavus</i> CRISPR |                                                                                                                                                                                                                                                                                                                                                     |                                                                                    |
|-------------------------------|-----------------------------------------------------------------------------------------------------------------------------------------------------------------------------------------------------------------------------------------------------------------------------------------------------------------------------------------------------|------------------------------------------------------------------------------------|
| Days to completion            | Reference                                                                                                                                                                                                                                                                                                                                           | QR to CellRepo example                                                             |
| 8                             | 13,14                                                                                                                                                                                                                                                                                                                                               |  |
| Steps                         |                                                                                                                                                                                                                                                                                                                                                     |                                                                                    |
| Day 1                         | 1. Start an overnight culture of <i>E. coli</i> ET12567 (conjugative strain used to transform by the plasmid into <i>Streptomyces</i> species) at 37°C in LB supplemented with Chloramphenicol and Kanamycin.                                                                                                                                       |                                                                                    |
| Day 2                         | 2. Prepare competent cells of <i>E. coli</i> ET12567.<br>3. Transform using your favourite protocol with pSA-CRISPR-BC.<br>4. Plate in LB supplemented with chloramphenicol (25 µg/mL), kanamycin (50 µg/mL) and apramycin (50 µg/mL).                                                                                                              |                                                                                    |
| Day 3                         | 5. Pick one colony and inoculate 5 mL of LB supplemented with Chloramphenicol, Kanamycin and Apramycin.                                                                                                                                                                                                                                             |                                                                                    |
| Day 4                         | 6. Pellet down cells.<br>7. Wash cells 3 times with 1 mL 2xYT media.<br>8. Heat shock ~10 <sup>8</sup> <i>S. albidoflavus</i> spores in 100 uL of 2xYT at 50°C for 10 min.<br>9. Use the 100uL spores to resuspend the <i>E. coli</i> pellet.<br>10. Plate on MS-agar supplemented with 20mM MgCl <sub>2</sub> .<br>11. Incubate overnight at 30°C. |                                                                                    |
| Day 5                         | 12. Dissolve Apramycin and Nalidixic Acid (which does not act against <i>S. albidoflavus</i> ) in 1mL H <sub>2</sub> O.<br>13. Overlay the antibiotic mixture on the plates. Let them dry.<br>14. Incubate at 30°C for 1 week.                                                                                                                      |                                                                                    |
| Day 6                         | 15. Restreak 10 <i>S. albidoflavus</i> colonies on MS/Nal at 37°C to cure the plasmids.<br>16. Grow until colonies appear.<br>17. Repeat three times.                                                                                                                                                                                               |                                                                                    |
| Day 7                         | 18. Restreak on MS-agar/Apra to check plasmid curing.                                                                                                                                                                                                                                                                                               |                                                                                    |
| Day 8                         | 19. Extract genomic DNA of cells using Sigma's Genomic extraction Kit.<br>20. Check barcode presence by PCR.                                                                                                                                                                                                                                        |                                                                                    |

*S. cerevisiae* barcoding protocols

| <i>S. cerevisiae</i> Cre-Lox |                                                                                                                                                                                                                                                                                                                                                                                                                                                                                |                                                                                    |
|------------------------------|--------------------------------------------------------------------------------------------------------------------------------------------------------------------------------------------------------------------------------------------------------------------------------------------------------------------------------------------------------------------------------------------------------------------------------------------------------------------------------|------------------------------------------------------------------------------------|
| Days to completion           | Reference                                                                                                                                                                                                                                                                                                                                                                                                                                                                      | QR to CellRepo example                                                             |
| 8                            | 15                                                                                                                                                                                                                                                                                                                                                                                                                                                                             |  |
| Steps                        |                                                                                                                                                                                                                                                                                                                                                                                                                                                                                |                                                                                    |
| Day 1                        | 1. Start an overnight culture of <i>S. cerevisiae</i> cells in YPD.                                                                                                                                                                                                                                                                                                                                                                                                            |                                                                                    |
| Day 2                        | 2. Inoculate 5mL of YPD with 500uL of culture at 30°C.<br>3. Incubate until OD=0.2-0.3.<br>4. Prepare competent cells by the LiAc method.<br>5. Transform with the PCR product coming from the cassette amplification of pSC-CreLox-BC ((both KanMX and <i>URA3</i> markers were tested)<br>6. Incubate in YPD for 2 hours (if the selected marker is <i>URA3</i> , this step can be skipped).<br>7. Plate on YPD supplemented with 200 µg/mL of G418 (or SC -uracil) at 30°C. |                                                                                    |
| Day 3                        | 8. Wait until colonies appear.<br>9. Check by PCR barcode presence.<br>10. Inoculate one positive clone in YPD.                                                                                                                                                                                                                                                                                                                                                                |                                                                                    |
| Day 4                        | 11. Repeat protocol of Day 1 to transform pBF3060_NatMX (cre recombinase expression).<br>12. Plate on YPD supplemented with 100 µg/mL Neurothreocin.<br>13. Plate at 30°C.                                                                                                                                                                                                                                                                                                     |                                                                                    |
| Day 5                        | 14. Inoculate 2 mL of appropriate media to maintain selection but with 2% Raffinose /0.1% Glucose as the carbon source.<br>15. Grow overnight at 30°C.                                                                                                                                                                                                                                                                                                                         |                                                                                    |
| Day 6                        | 16. Make a 1/10 dilution using the appropriate selection media supplemented with 2% Galactose and 0.1% Glucose (this induces the expression of CreA).<br>17. Plate cells in YPD/Neurothreocin.                                                                                                                                                                                                                                                                                 |                                                                                    |
| Day 7                        | 18. Check selection cassette removal by colony PCR<br>19. Inoculate 2 mL of YPD without antibiotic with a positive clone (this step may need to be repeated 2 or 3 days to allow the plasmid curation).<br>20. Grow overnight at 30°C.                                                                                                                                                                                                                                         |                                                                                    |
| Day 8                        | 21. Plate on YPD after dilution looking for single colonies.<br>22. Check the single colonies for Neurothreocin sensitivity (pSC-Crelox-BC curation).                                                                                                                                                                                                                                                                                                                          |                                                                                    |

pBF3060 was a gift from Nancy DaSilva & Suzanne Sandmeyer (Addgene plasmid # 26850).

| <i>S. cerevisiae</i> CRISPR |                                                                                                                                                                                                                                                                                 |                                                                                    |
|-----------------------------|---------------------------------------------------------------------------------------------------------------------------------------------------------------------------------------------------------------------------------------------------------------------------------|------------------------------------------------------------------------------------|
| Days to completion          | Reference                                                                                                                                                                                                                                                                       | QR to CellRepo example                                                             |
| 6                           | 16                                                                                                                                                                                                                                                                              |  |
| Steps                       |                                                                                                                                                                                                                                                                                 |                                                                                    |
| Day 1                       | 1. Start an overnight culture of <i>S. cerevisiae</i> cells in YPD.                                                                                                                                                                                                             |                                                                                    |
| Day 2                       | 2. Inoculate 5mL of YPD with 500uL of culture at 30°C.<br>3. Incubate until OD=0.2-0.3<br>4. Prepare competent cells by the LiAc method.<br>5. Transform with pCfBf2312 (Cas9).<br>6. Incubate in YPD for 2 hours.<br>7. Plate on YPD supplemented with 200 µg/mL G418 at 30°C. |                                                                                    |
| Day 3                       | 8. Wait until colonies appear.<br>9. Inoculate a positive clone into YPD/G418 at 30°C.                                                                                                                                                                                          |                                                                                    |
| Day 4                       | 10. Repeat protocol of Day 1 to co-transform pCfBf3020 (gRNA) and the PCR product coming from pSC-CRISPR-BC.<br>11. Incubate in YPD for 2 hours.<br>12. Plate on YPD supplemented with Neurothreocin (100 µg/mL) and G418 (200 µg/mL) at 30°C.                                  |                                                                                    |
| Day 5                       | 13. Wait until colonies appear.<br>14. Check by PCR barcode presence<br>15. Inoculate a positive clone in YPD without antibiotic (this step may need to be repeated 2 or 3 days to allow the plasmids curation).                                                                |                                                                                    |
| Day 6                       | 16. Plate on YPD after dilution looking for single colonies.<br>17. Test Neurothreocin and G418 sensitive colonies.                                                                                                                                                             |                                                                                    |

In short, the procedure is based on two plasmids and a PCR repair template.

pCfBf2312, pCfBf2899 and pCfBf3020 were a gift from Irina Borodina (Addgene plasmid # 78231, 73271 and 73282 respectively).

sgRNA: 5' - promoter – CTCTCGAAGTGGTCACGTGC– scaffold – terminator 3'.

## *K. phaffii* barcoding protocol

Adapted from “Thermo Fisher Scientific’s pPICZ A, B, and C transformation protocol (Manual part no. 25-0148)”. A version of pPICZ vector, pICXNH3<sup>17</sup> was used to create our vector. The barcode sequence was inserted after the *AOX1* terminator sequence. The vector allows the integration of any desired protein after the *AOX1* promoter. SacI was used to linearize the plasmid. pICXNH3 was a gift from Raimund Dutzler & Eric Geertsma (Addgene plasmid # 49020).

| <i>K. phaffii</i> barcoding |                                                                                                                                                                                                                                                                                                                                                                                                                                                                                                                                                                                                                                                                                                                                                                                                                                                                                                                                                                                                                                                                                                                                                                                                                                                                                                                                                                                                          |                                                                                    |
|-----------------------------|----------------------------------------------------------------------------------------------------------------------------------------------------------------------------------------------------------------------------------------------------------------------------------------------------------------------------------------------------------------------------------------------------------------------------------------------------------------------------------------------------------------------------------------------------------------------------------------------------------------------------------------------------------------------------------------------------------------------------------------------------------------------------------------------------------------------------------------------------------------------------------------------------------------------------------------------------------------------------------------------------------------------------------------------------------------------------------------------------------------------------------------------------------------------------------------------------------------------------------------------------------------------------------------------------------------------------------------------------------------------------------------------------------|------------------------------------------------------------------------------------|
| Days to completion          | Reference                                                                                                                                                                                                                                                                                                                                                                                                                                                                                                                                                                                                                                                                                                                                                                                                                                                                                                                                                                                                                                                                                                                                                                                                                                                                                                                                                                                                | QR to CellRepo example                                                             |
| 5                           | “Thermo Fisher Scientific’s pPICZ A, B, and C transformation protocol (Manual part no. 25-0148)”                                                                                                                                                                                                                                                                                                                                                                                                                                                                                                                                                                                                                                                                                                                                                                                                                                                                                                                                                                                                                                                                                                                                                                                                                                                                                                         |  |
| Steps                       |                                                                                                                                                                                                                                                                                                                                                                                                                                                                                                                                                                                                                                                                                                                                                                                                                                                                                                                                                                                                                                                                                                                                                                                                                                                                                                                                                                                                          |                                                                                    |
| Day 1                       | <ol style="list-style-type: none"> <li>1. Digest ~5–10 µg of barcoded plasmid DNA with SacI</li> <li>2. Check linearization in agarose gel</li> <li>3. Column purify the digestion reaction</li> <li>4. Grow 5 mL of <i>Pichia pastoris</i> strain in YPD at 30°C overnight.</li> </ol>                                                                                                                                                                                                                                                                                                                                                                                                                                                                                                                                                                                                                                                                                                                                                                                                                                                                                                                                                                                                                                                                                                                  |                                                                                    |
| Day 2                       | <ol style="list-style-type: none"> <li>5. Inoculate 50 mL of fresh medium with the overnight culture.</li> <li>6. Grow overnight again to an OD600 = 1.3–1.5.</li> </ol>                                                                                                                                                                                                                                                                                                                                                                                                                                                                                                                                                                                                                                                                                                                                                                                                                                                                                                                                                                                                                                                                                                                                                                                                                                 |                                                                                    |
| Day 3                       | <ol style="list-style-type: none"> <li>7. Centrifuge the cells at 1,500 × g for 5 minutes at 4°C. Resuspend the pellet with 500 ml of ice-cold, sterile water.</li> <li>8. Centrifuge again, then resuspend the pellet with 250 ml of ice cold, sterile water.</li> <li>9. Centrifuge again, then resuspend the pellet in 20 ml of ice-cold 1 M sorbitol.</li> <li>10. Centrifuge again, then resuspend the pellet in 1 ml of ice-cold 1 M sorbitol for a final volume of approximately 1.5 ml. Keep the cells on ice and use that day. Do not store cells.</li> <li>11. Mix 80 µL of the cells from Step 6 (previous page) with 5–10 µg of linearized DNA (in 5–10 µL sterile water) and transfer them to an ice-cold 0.2 cm electroporation cuvette.</li> <li>12. Incubate the cuvette with the cells on ice for 5 minutes.</li> <li>13. Pulse the cells using the manufacturer’s instructions for <i>Saccharomyces cerevisiae</i>.</li> <li>14. Immediately add 1 ml of ice-cold 1 M sorbitol to the cuvette. Transfer the cuvette contents to a sterile 15-ml tube and incubate at 30°C without shaking for 1 to 2 hours.</li> <li>15. Spread 10, 25, 50, 100, and 200 µl each on separate, labelled YPDS plates containing 100 µg/ml Zeocin. Plating at low cell densities favours efficient Zeocin™ selection.</li> <li>16. Incubate plates from 3–10 days at 30°C until colonies form.</li> </ol> |                                                                                    |
| Day 4                       | <ol style="list-style-type: none"> <li>17. Pick 10–20 colonies and purify (streak for single colonies) on fresh YPD or YPDS plates containing 100 µg/ml Zeocin.</li> </ol>                                                                                                                                                                                                                                                                                                                                                                                                                                                                                                                                                                                                                                                                                                                                                                                                                                                                                                                                                                                                                                                                                                                                                                                                                               |                                                                                    |
| Day 5                       | <ol style="list-style-type: none"> <li>18. Colony PCR to check barcode presence.</li> </ol>                                                                                                                                                                                                                                                                                                                                                                                                                                                                                                                                                                                                                                                                                                                                                                                                                                                                                                                                                                                                                                                                                                                                                                                                                                                                                                              |                                                                                    |

## ***Recipes of media used in this study***

LB (1 L):

- 10 g tryptone
- 10 g NaCl
- 5 g yeast extract
- Up to 1 L distilled water

SMM (1 L):

- 2 g Ammonium sulphate
- 14 g Dipotassium hydrogen phosphate
- 6 g potassium dihydrogen phosphate
- 1 g trisodium citrate dihydrate
- 0.2 g magnesium sulphate heptahydrate
- Up to 1 L distilled water

*B. subtilis* MM (10 mL):

- 10 mL SMM basic salts
- 125 µL 40% (w/v) glucose
- 100 µL 2% (w/v) tryptophan
- 60 µL 1M Mg<sub>2</sub>SO<sub>4</sub>·7H<sub>2</sub>O
- 10 µL 20% (w/v) casamino acids
- 5 µL 2.2mg/ml ferric ammonium citrate.

*B. subtilis* starvation media (10 mL):

- 10 mL SMM basic salts
- 125 µL 40% (w/v) glucose
- 60 µL 1M Mg<sub>2</sub>SO<sub>4</sub>·7H<sub>2</sub>O

M9 minimal medium recipe (1L):

- 6 g Na<sub>2</sub>HPO<sub>4</sub>
- 3 g KH<sub>2</sub>PO<sub>4</sub>
- 0.5 g NH<sub>4</sub>Cl
- 0.5 g NaCl
- 0.2 g MgSO<sub>4</sub>·7H<sub>2</sub>O

NA plates (100 mL):

- 2.8 g oxoid nutrient agar
- Up to 100 mL distilled water

TSB (1 L):

- 30 g Tryptic Soy Broth powder
- Up to 1 L distilled water

2xYT (1 L)

- 16 g tryptone
- 10 g yeast extract
- 5 g NaCl
- Up to 1 L distilled water.

MS plates (1 L):

- 20 g mannitol
- 20 g soy flour
- 20 g agar
- Up to 1 L distilled water

YPD (1 L):

- 20 g peptone
- 10 g yeast extract
- Up to 1 L distilled water
- Add glucose to 2% final concentration after autoclaving

SC dropout plates (100 mL) (compounds from Formedium):

- 690 mg Nitrogen base without amino acids
- 162.2 mg of Leucine dropout or 192.6 mg of Uracil dropout mixture
- 2.4 g agar
- Up to 100 mL

SC dropout plates without ammonium sulphate (100 mL) (compounds from Formedium):

- 190 mg Nitrogen base without amino acids and without ammonium sulphate
- 162.2 mg of Leucine dropout or 192.6 mg of Uracil dropout mixture
- 2.4 g agar
- Up to 100 mL

GNA plates (100 mL):

- 5 g D-glucose
- 3 g Nutrient broth
- 1 g yeast extract
- 2.4 g agar
- Up to 100 mL distilled water

SPOR plates (100 mL):

- 1 g potassium acetate
- 100 mg yeast extract
- 50 mg glucose
- 2.4 g agar
- Up to 100 mL distilled water

## **Supplementary Figures**

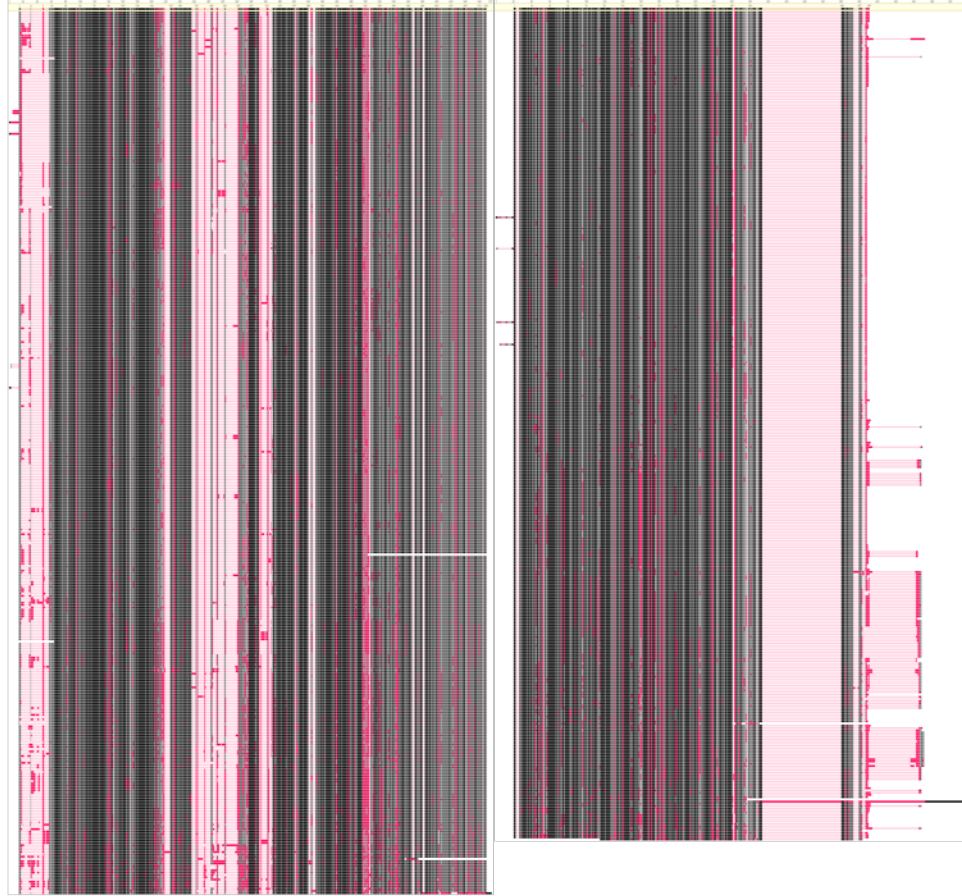

|                   | AGI90205.1  | AGI90207.1 |
|-------------------|-------------|------------|
| Alignment length  | 677         | 518        |
| Sequences         | 387         | 373        |
| Identical Sites   | 163 (24.4%) | 91 (19.6%) |
| Pairwise Identity | 83.4%       | 85.3%      |

**Supplementary Fig. 1.**

Conservation pattern of the putative essential gene pair AGI90205.1 (IMP cyclohydrolase / Phosphoribosylaminoimidazolecarboxamide formyltransferase) and AGI90207.1 (Bifunctional protein FOLD) (encoded by loci XNR\_3870 and XNR\_3872 respectively). Both protein sequences were aligned against the classified *Streptomyces* database using BLAST. The hits were aligned using MAFFT included in Geneious Software package. Black colour indicates a higher similarity. Pink colour indicates a lower similarity. Spaces indicate alignment gaps. The alignment statistics were calculated by Geneious.

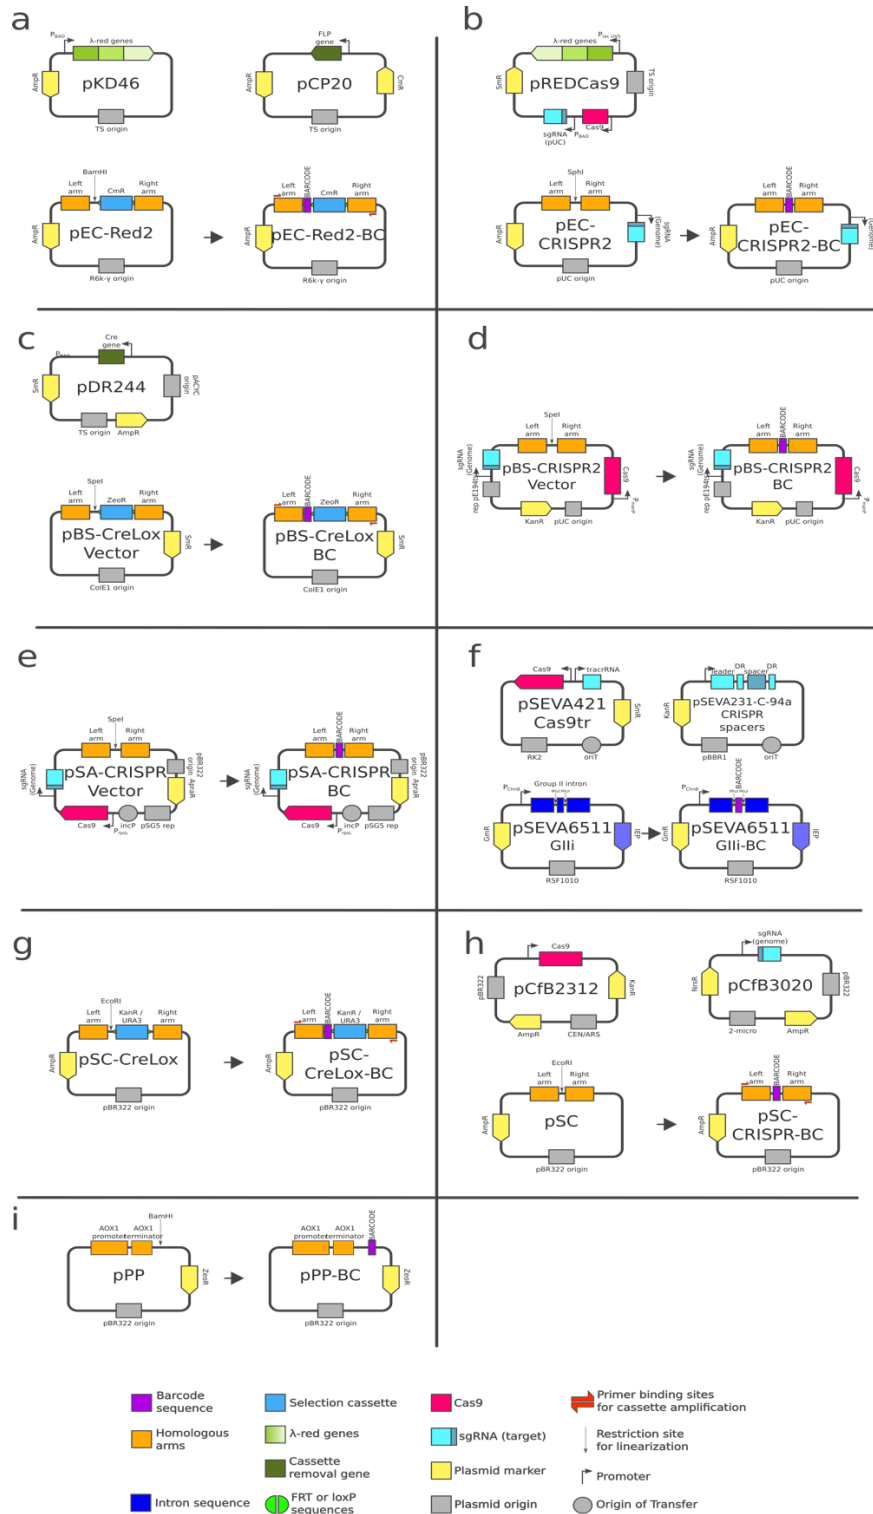

**Supplementary Fig. 2.**

Maps of the barcoding plasmids used in this study. a) *E. coli* lambda-red. b) *E. coli* CRISPR. c) *B. subtilis* Cre-Lox. d) *B. subtilis* CRISPR. e) *S. albidoflavus* CRISPR. f) *P. putida* CRISPR/targetron. g) *S. cerevisiae* Cre-Lox. h) *S. cerevisiae* CRISPR. i) *K. phaffii* *AOX1* insertion.



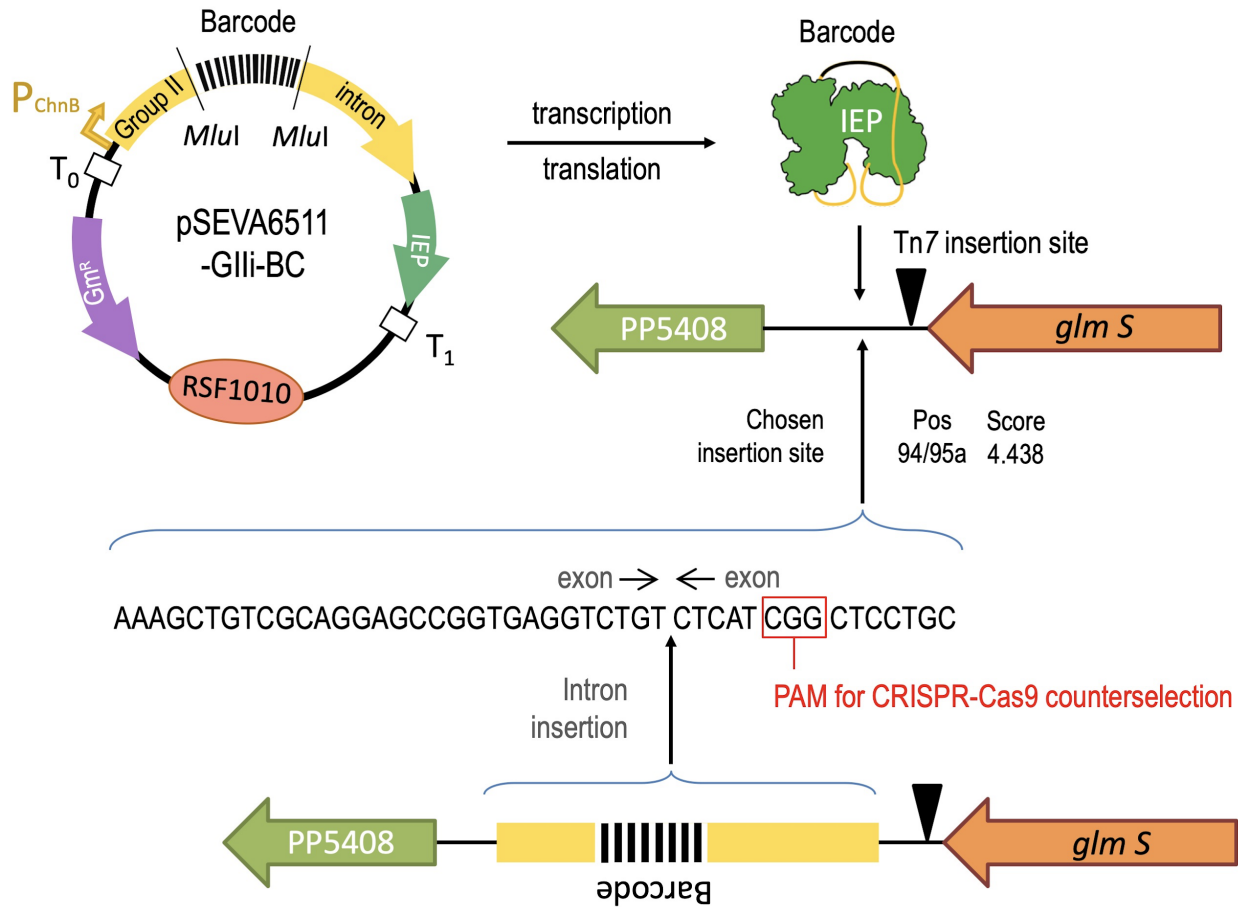

**Supplementary Fig. 3.**

Insertion of a barcode in a permissive site of the genome of *Pseudomonas putida*. Once committed, the barcode was assembled as part of the Group II intron sequence of plasmid pSEVA6511-GIIi-BC, which co-transcribes the corresponding RNA along with an intron-encoded protein (IEP) with reverse transcriptase activity. Upon induction of the expression system with cyclohexanone, a ribonucleoprotein (RNP) complex is formed that contains the excised intron RNA and IEP. After RNA splicing, the group II intron RNP recognizes DNA target sequences for intron insertion by using both the IEP and base pairing of the intron RNA. In our case the site of insertion is chosen in the proximity of the Tn7 insertion site and is predicted to occur with the target identification algorithm in the site indicated. Note also the PAM site exploited for counterselection of the non-inserted, wild-type region with the CRISPR/Cas9 system explained in the text.

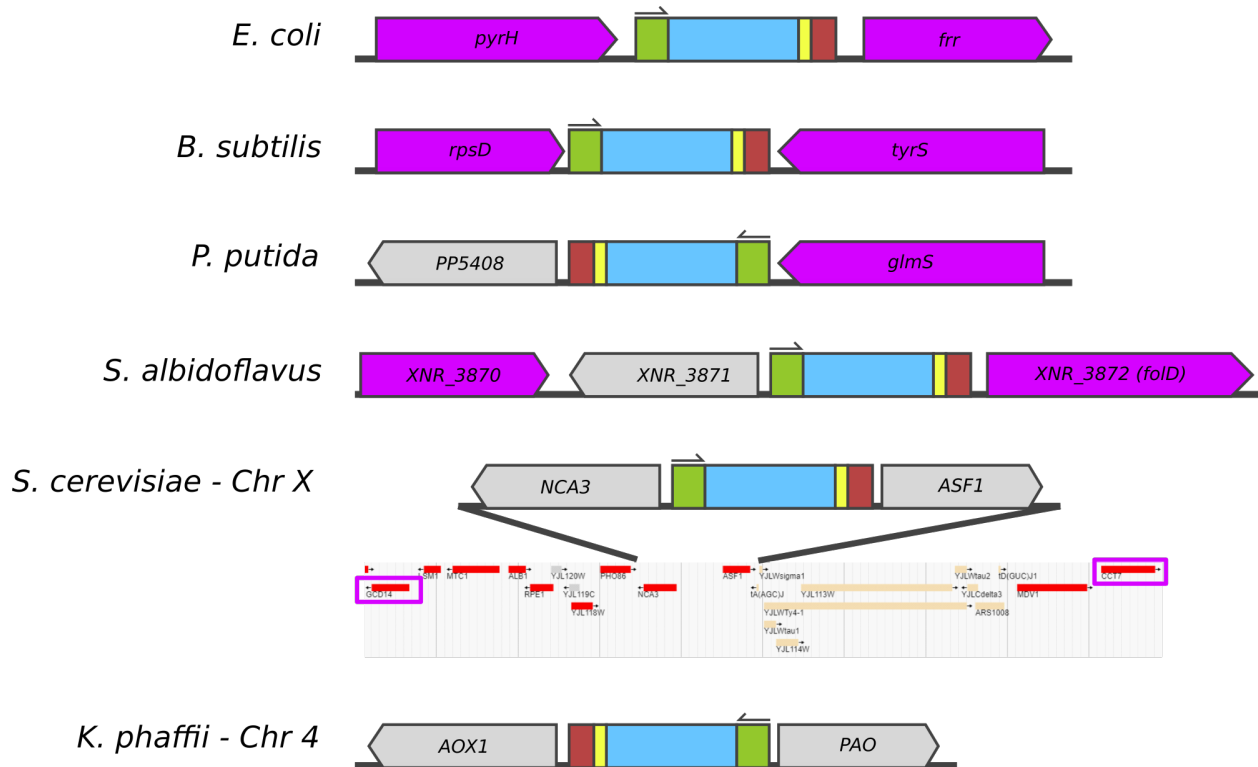

**Supplementary Fig. 4.**

Barcoding locations used in this study. Purple colour indicates essential genes. Universal sequencing primer site (green), barcode sequence (blue), synchronisation sequence (yellow) and checksum (red). *S. cerevisiae* genomic map was obtained from <https://www.yeastgenome.org/>

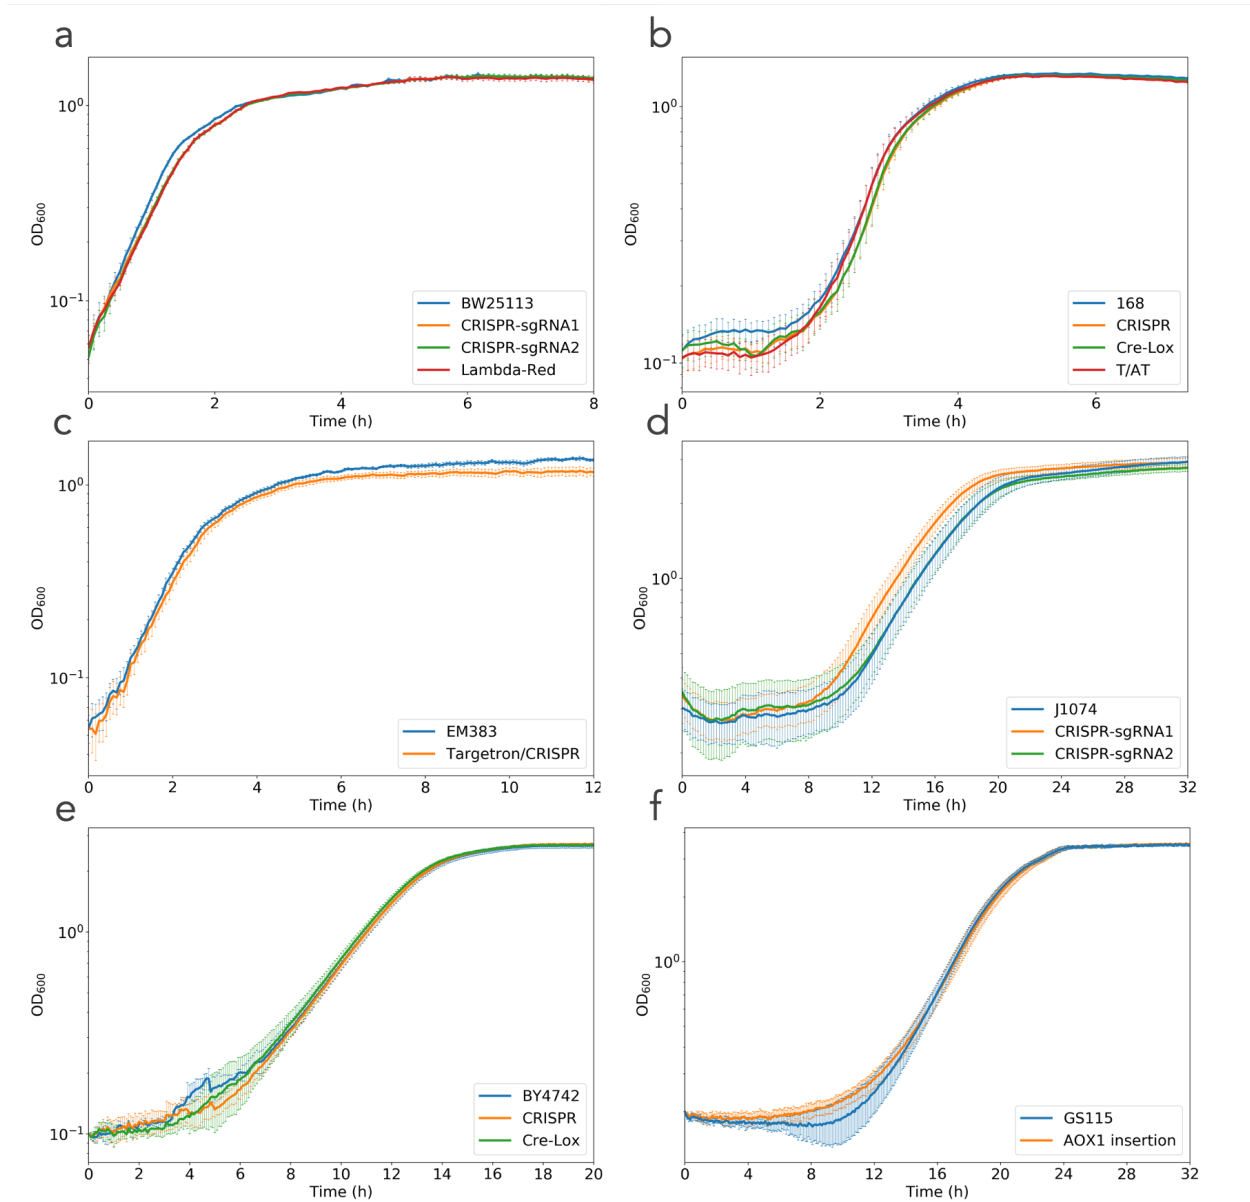

**Supplementary Fig. 5.**

Growth profile comparison between wild-type strains and barcoded strains. Wild-type strains are shown in blue. a) *E. coli*. b) *B. subtilis*. c) *P. putida*. d) *S. albidoflavus*. e) *S. cerevisiae*. f) *K. phaffii*. Note that the variation in *S. albidoflavus* graph can be explained due to cells grown on solid tryptic soy agar. n=3 biologically independent colonies were used for each control and barcoded strain. Data are presented as mean values +/- standard deviation.

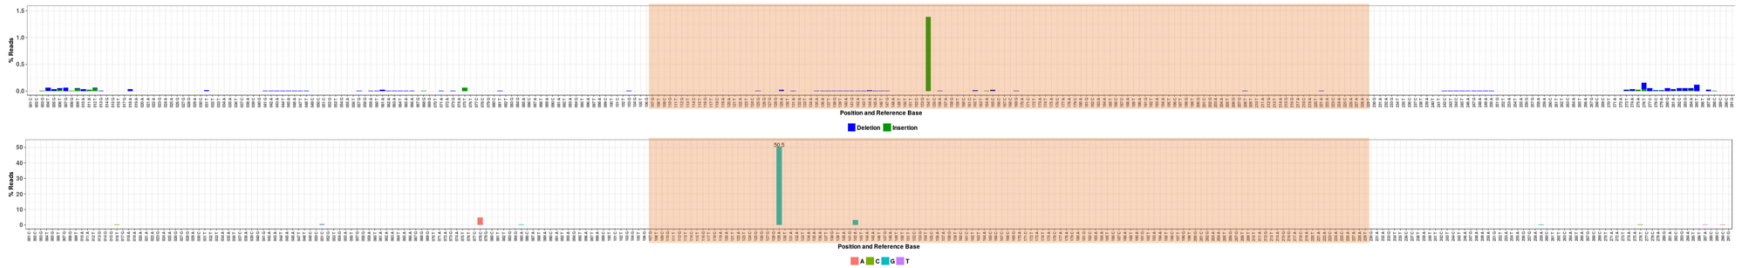

**Supplementary Fig. 6.**

*E. coli* amplicon NGS. Glycerol control. Barcode sequence indicated by the orange region. Upper graph: percentage of reads showing a specific deletion/insertion. Lower graph: percentage of reads showing a specific base pair change. ~17000 read depth.

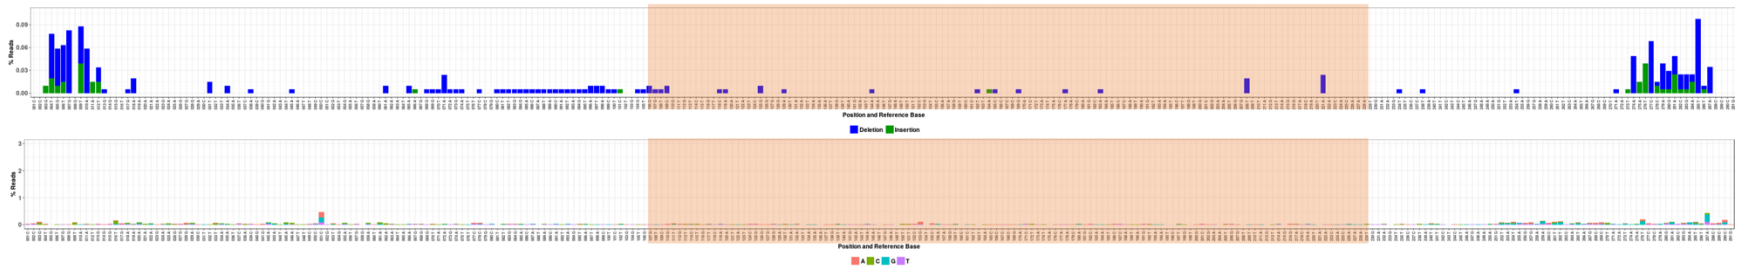

**Supplementary Fig. 7.**

*E. coli* amplicon NGS. Condition 1. Barcode sequence indicated by the orange region. Upper graph: percentage of reads showing a specific deletion/insertion. Lower graph: percentage of reads showing a specific base pair change. ~19500 read depth.

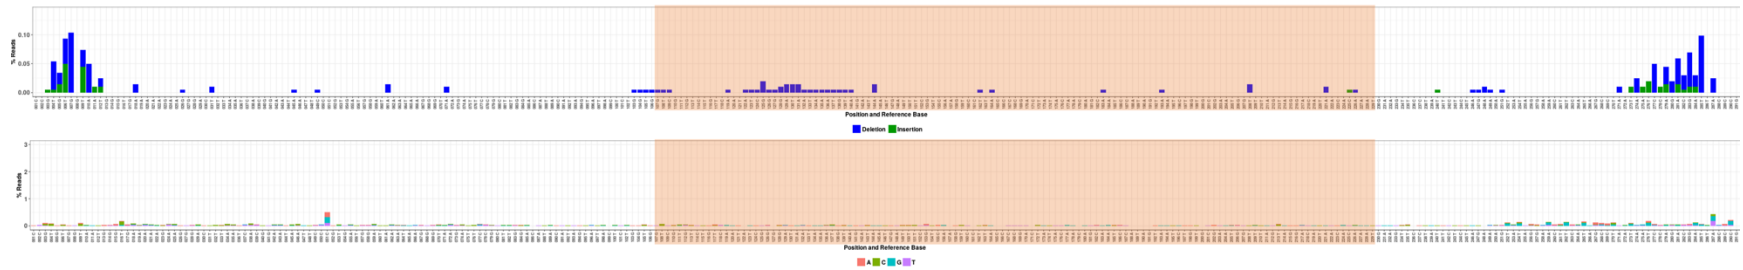

**Supplementary Fig. 8.**

*E. coli* amplicon NGS. Condition 2. Barcode sequence indicated by the orange region. Upper graph: percentage of reads showing a specific deletion/insertion. Lower graph: percentage of reads showing a specific base pair change. ~19200 read depth.

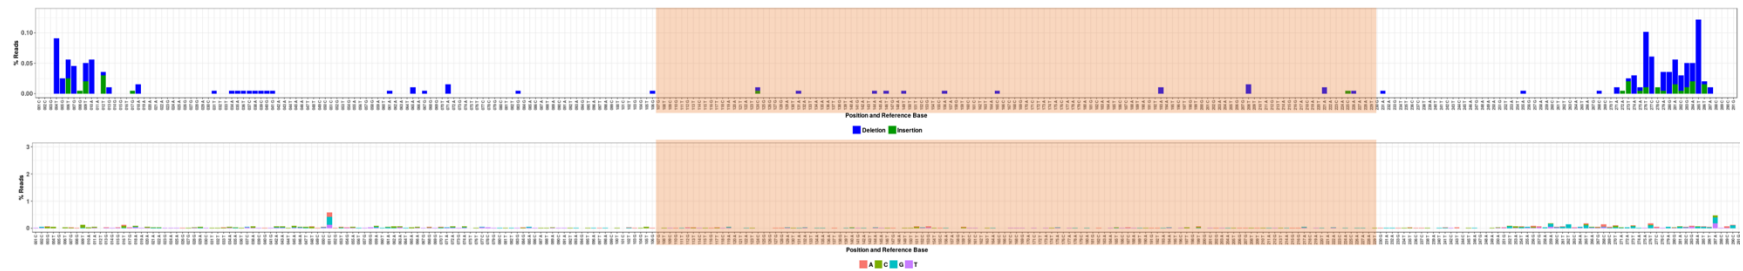

**Supplementary Fig. 9.**

*E. coli* amplicon NGS. Condition 3. Barcode sequence indicated by the orange region. Upper graph: percentage of reads showing a specific deletion/insertion. Lower graph: percentage of reads showing a specific base pair change. ~18700 read depth.

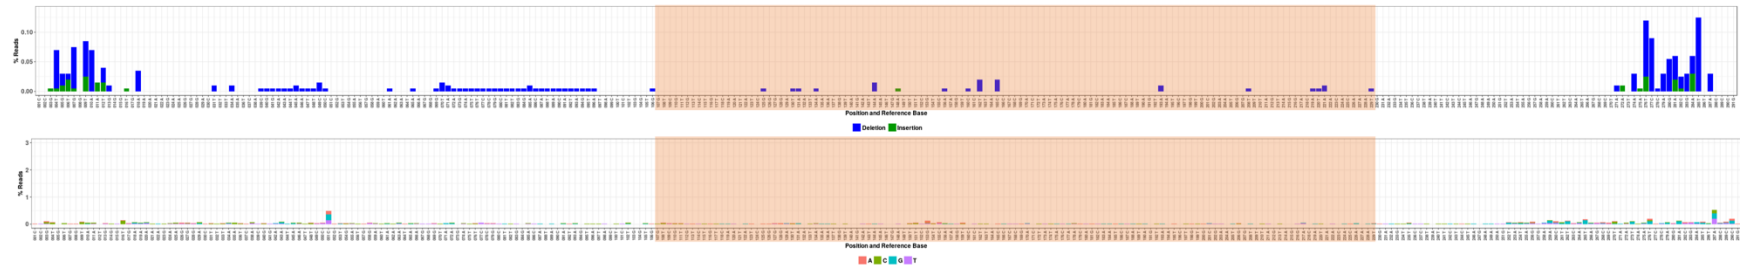

**Supplementary Fig. 10.**

*E. coli* amplicon NGS. Condition 4. Barcode sequence indicated by the orange region. Upper graph: percentage of reads showing a specific deletion/insertion. Lower graph: percentage of reads showing a specific base pair change. ~19200 read depth.



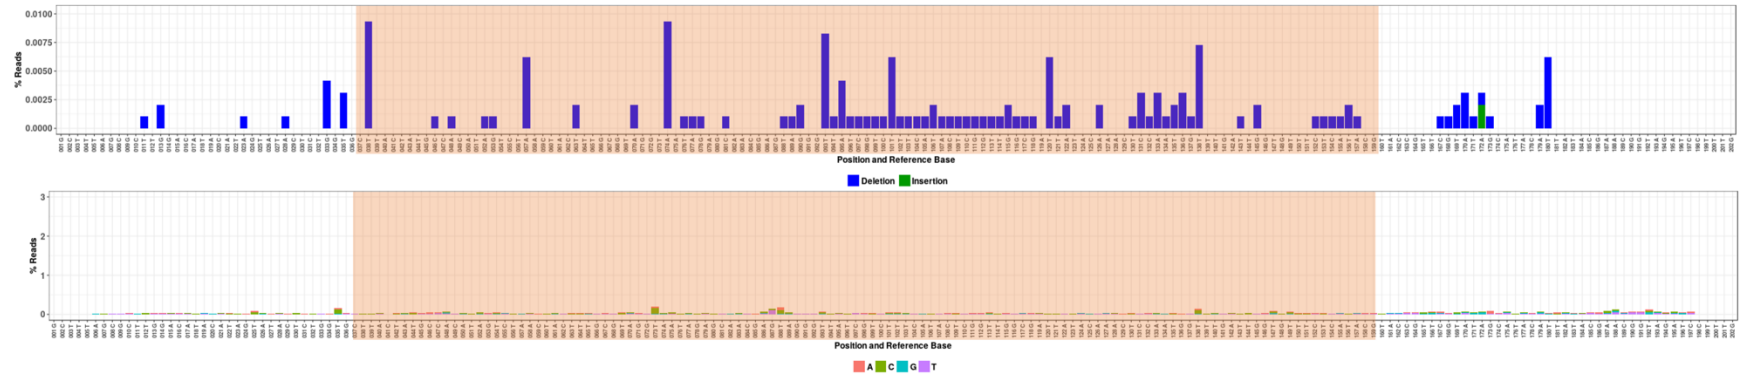

**Supplementary Fig. 11.**

*B. subtilis* amplicon NGS. Glycerol control. Barcode sequence indicated by the orange region. Upper graph: percentage of reads showing a specific deletion/insertion. Lower graph: percentage of reads showing a specific base pair change. ~95500 read depth.

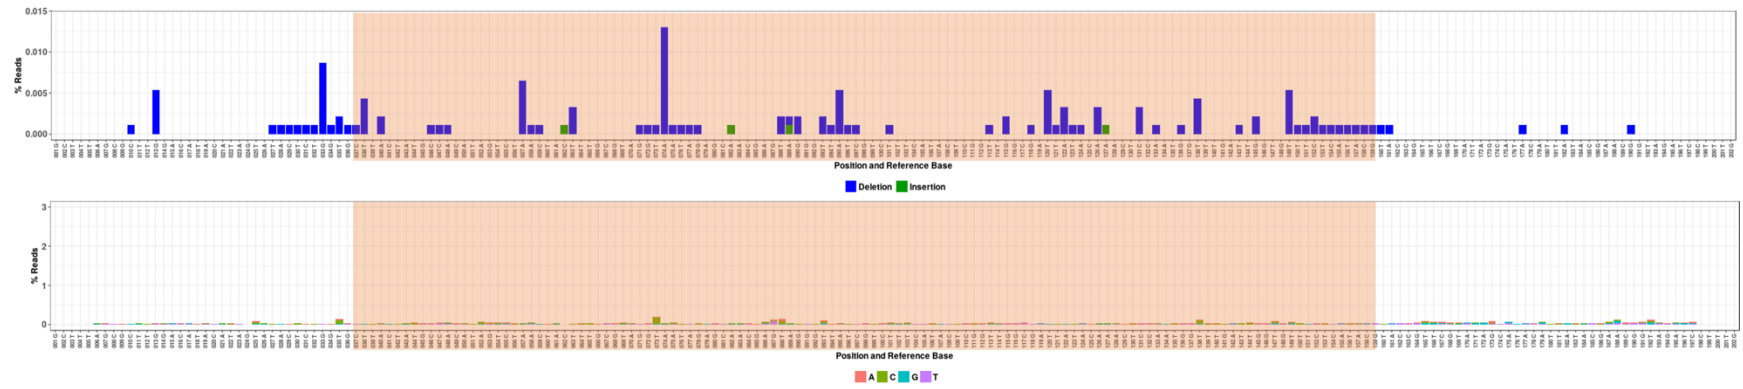

**Supplementary Fig. 12.**

*B. subtilis* amplicon NGS. Condition 1. Barcode sequence indicated by the orange region. Upper graph: percentage of reads showing a specific deletion/insertion. Lower graph: percentage of reads showing a specific base pair change. ~91400 read depth.

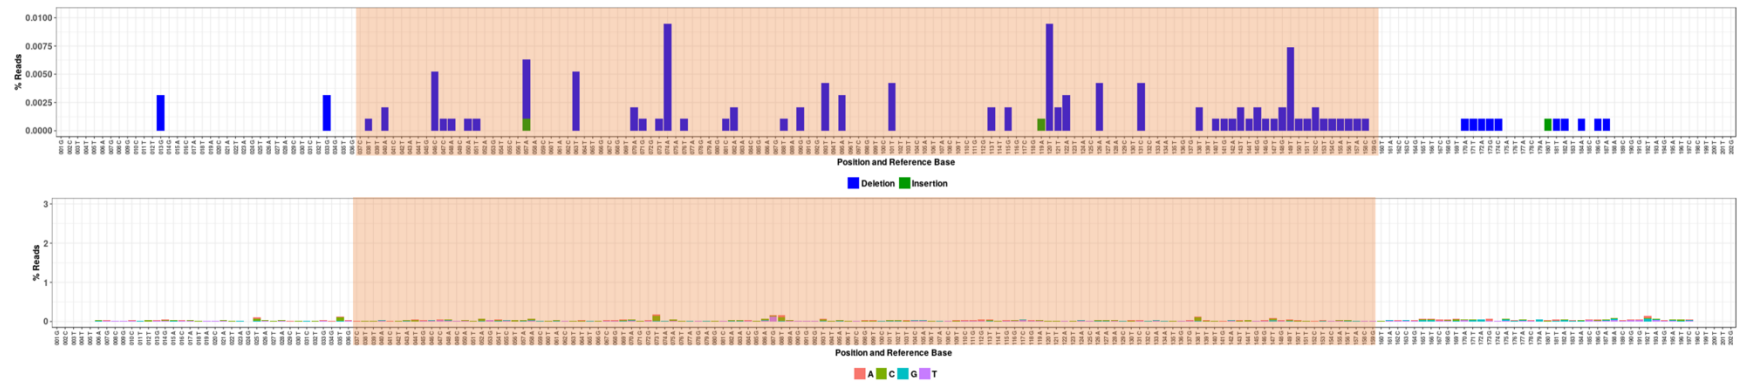

**Supplementary Fig. 13.**

*B. subtilis* amplicon NGS. Condition 2. Barcode sequence indicated by the orange region. Upper graph: percentage of reads showing a specific deletion/insertion. Lower graph: percentage of reads showing a specific base pair change. ~94300 read depth.

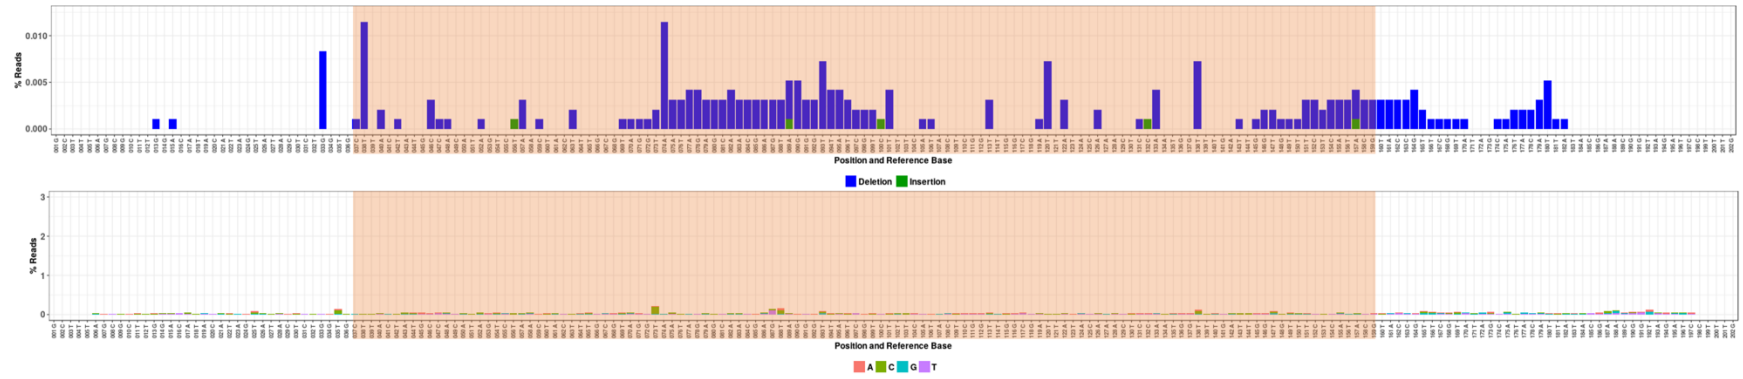

Supplementary Fig. 14.

*B. subtilis* amplicon NGS. Condition 3. Barcode sequence indicated by the orange region. Upper graph: percentage of reads showing a specific deletion/insertion. Lower graph: percentage of reads showing a specific base pair change. ~95000 read depth.

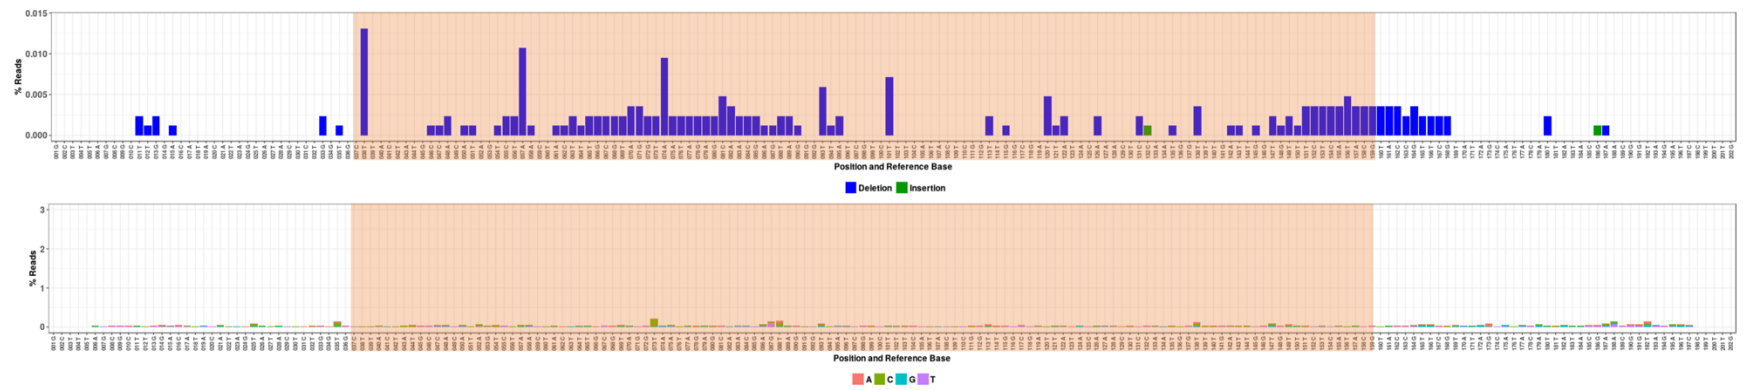

**Supplementary Fig. 15.**

*B. subtilis* amplicon NGS. Condition 4. Barcode sequence indicated by the orange region. Upper graph: percentage of reads showing a specific deletion/insertion. Lower graph: percentage of reads showing a specific base pair change. ~83200 read depth.

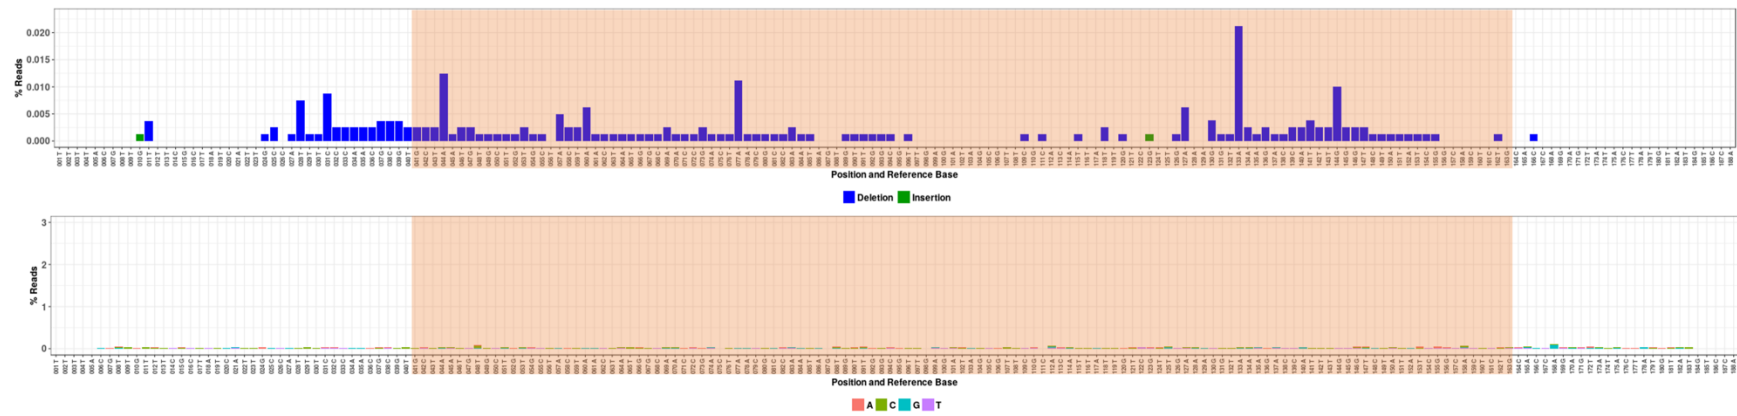

Supplementary Fig. 16.

*P. putida* amplicon NGS. Glycerol control. Barcode sequence indicated by the orange region. Upper graph: percentage of reads showing a specific deletion/insertion. Lower graph: percentage of reads showing a specific base pair change. ~79900 read depth.

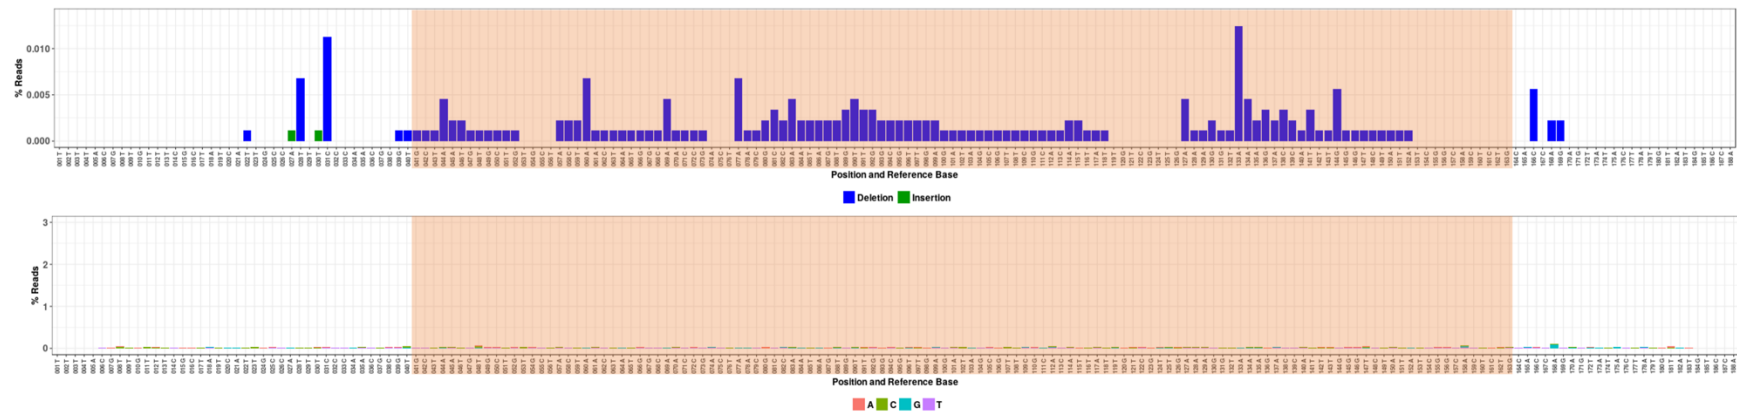

**Supplementary Fig. 17.**

*P. putida* amplicon NGS. Condition 1. Barcode sequence indicated by the orange region. Upper graph: percentage of reads showing a specific deletion/insertion. Lower graph: percentage of reads showing a specific base pair change. ~88300 read depth.

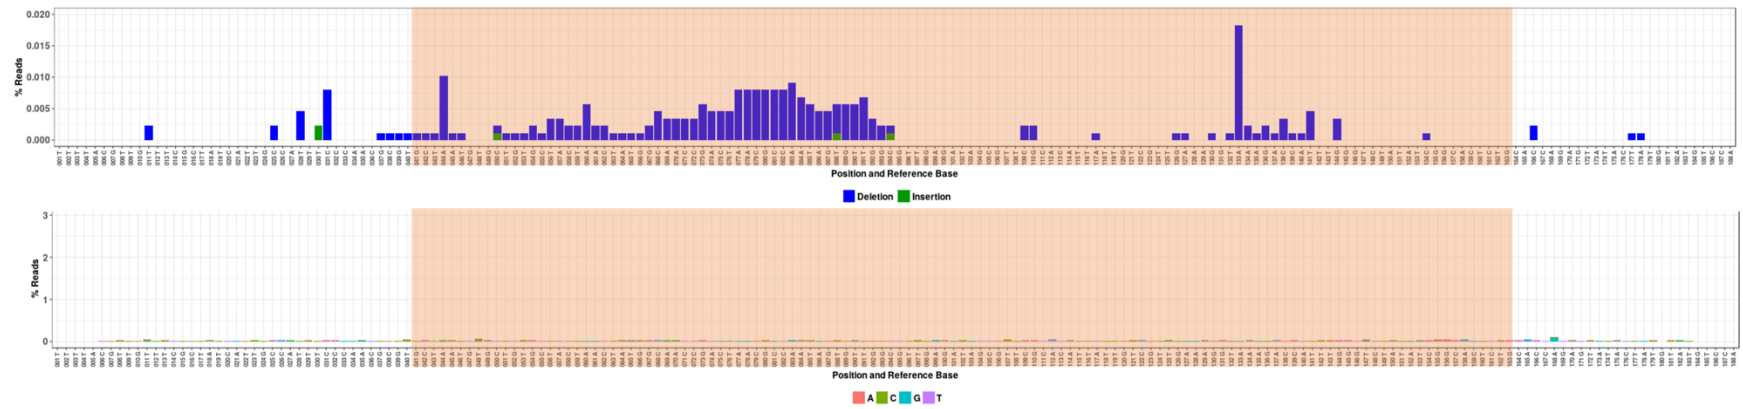

**Supplementary Fig. 18.**

*P. putida* amplicon NGS. Condition 2. Barcode sequence indicated by the orange region. Upper graph: percentage of reads showing a specific deletion/insertion. Lower graph: percentage of reads showing a specific base pair change. ~87400 read depth.



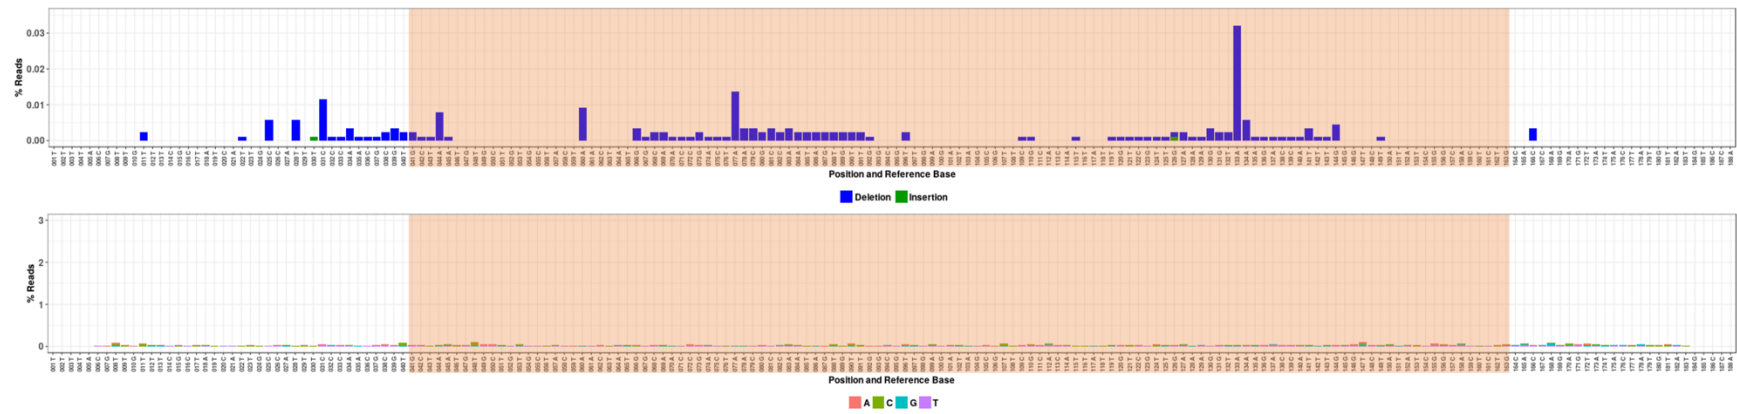

**Supplementary Fig. 19.**

*P. putida* amplicon NGS. Condition 3. Barcode sequence indicated by the orange region. Upper graph: percentage of reads showing a specific deletion/insertion. Lower graph: percentage of reads showing a specific base pair change. ~86800 read depth.

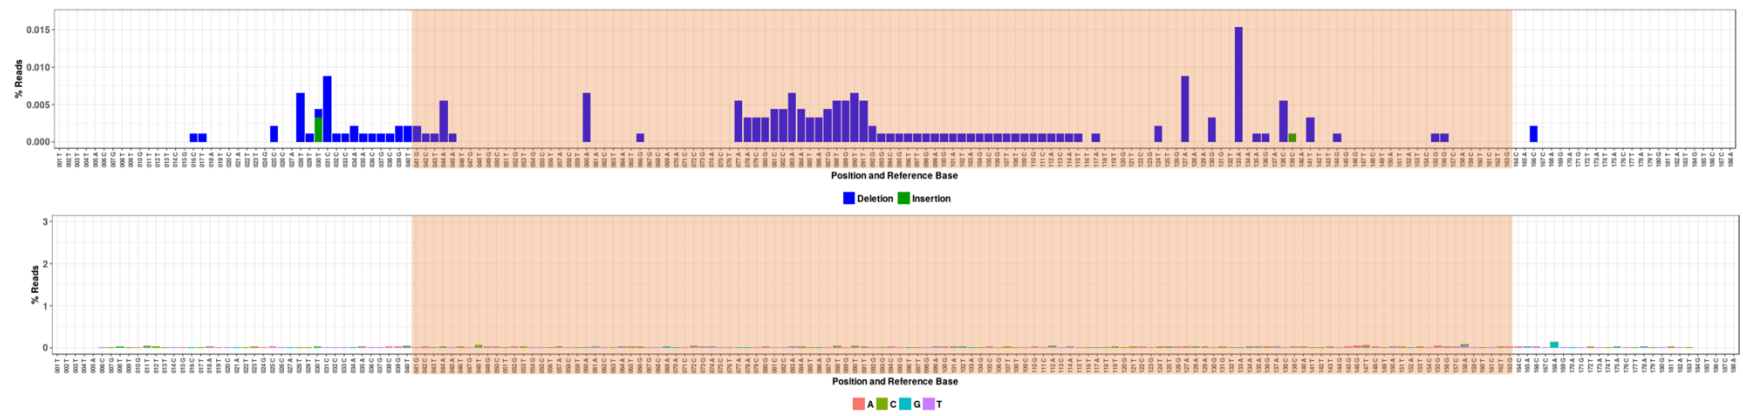

**Supplementary Fig. 20.**

*P. putida* amplicon NGS. Condition 4. Barcode sequence indicated by the orange region. Upper graph: percentage of reads showing a specific deletion/insertion. Lower graph: percentage of reads showing a specific base pair change. ~90800 read depth.

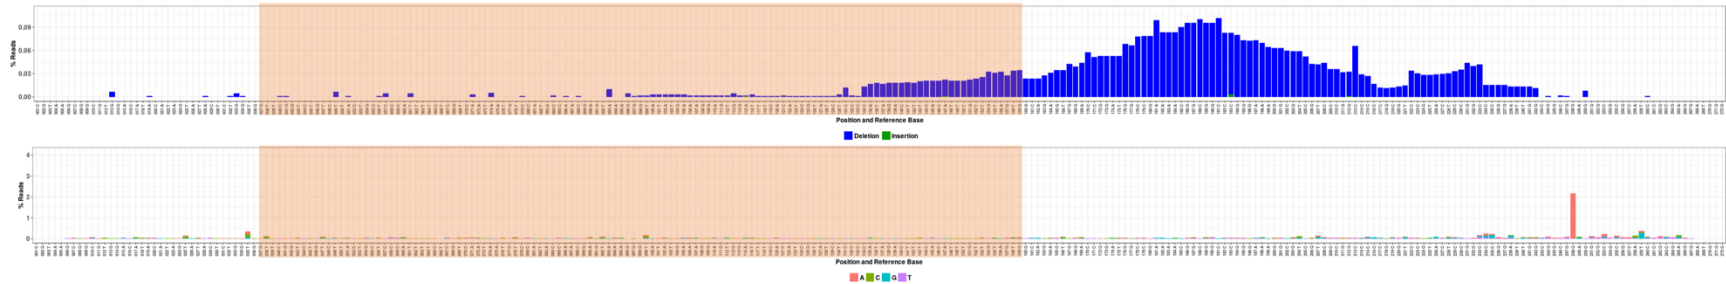

**Supplementary Fig. 21.**

*S. albidoflavus* amplicon NGS. Glycerol control. Barcode sequence indicated by the orange region. Upper graph: percentage of reads showing a specific deletion/insertion. Lower graph: percentage of reads showing a specific base pair change. ~87400 read depth.

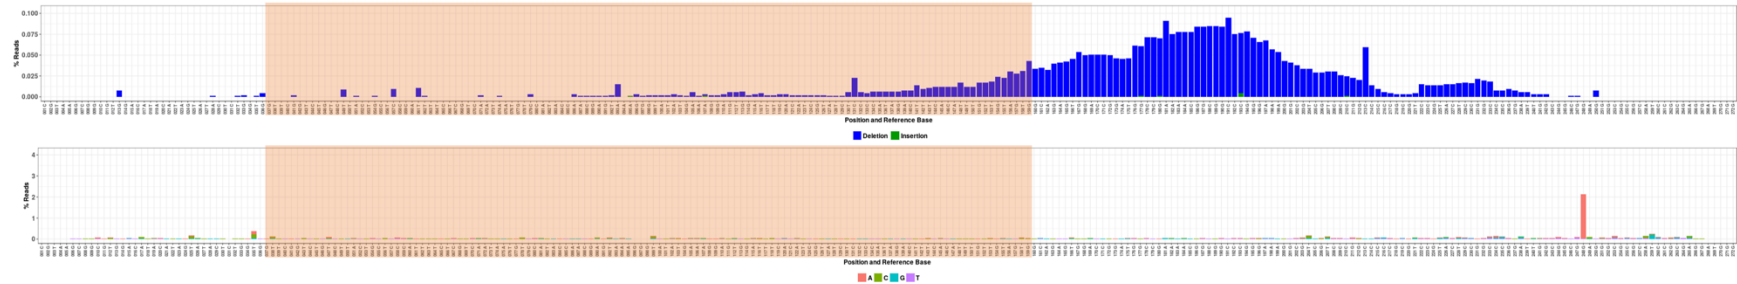

**Supplementary Fig. 22.**

*S. albidoflavus* amplicon NGS. Condition 1. Barcode sequence indicated by the orange region. Upper graph: percentage of reads showing a specific deletion/insertion. Lower graph: percentage of reads showing a specific base pair change. ~91700 read depth.

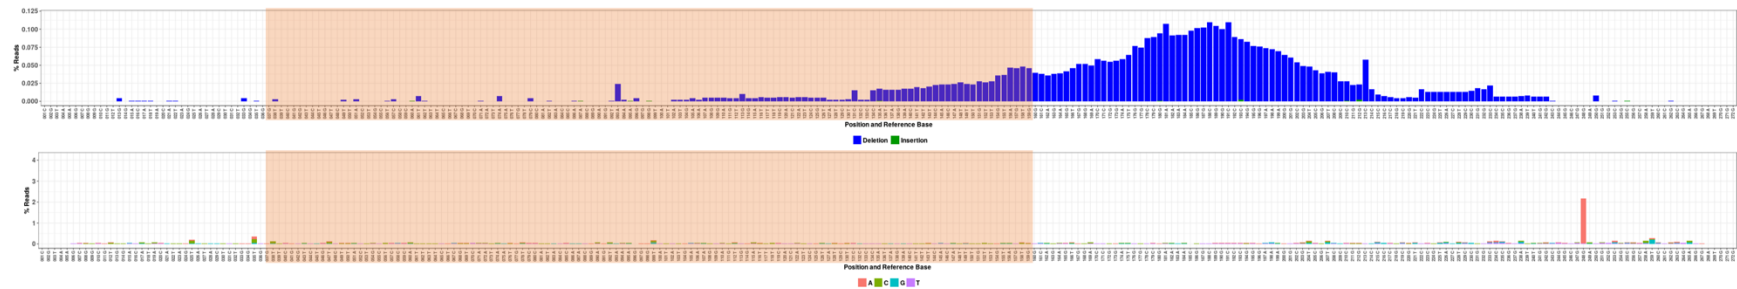

**Supplementary Fig. 23.**

*S. albidoflavus* amplicon NGS. Condition 2. Barcode sequence indicated by the orange region. Upper graph: percentage of reads showing a specific deletion/insertion. Lower graph: percentage of reads showing a specific base pair change. ~96800 read depth.

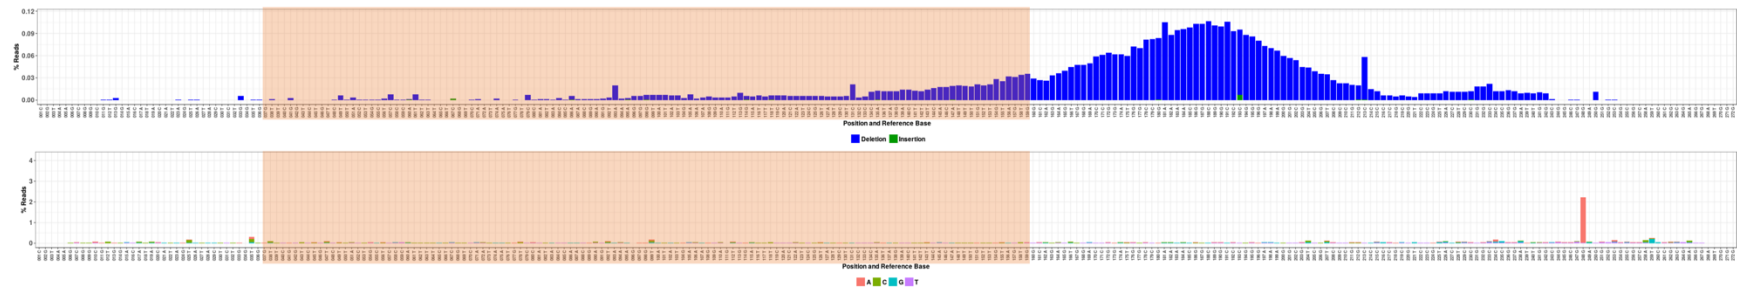

**Supplementary Fig. 24.**

*S. albidoflavus* amplicon NGS. Condition 3. Barcode sequence indicated by the orange region. Upper graph: percentage of reads showing a specific deletion/insertion. Lower graph: percentage of reads showing a specific base pair change. ~128500 read depth.

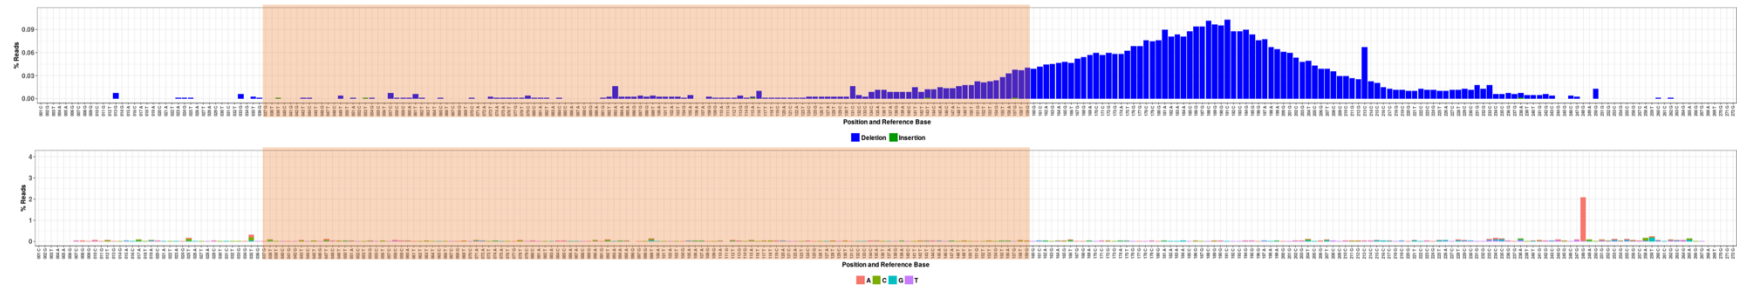

**Supplementary Fig. 25.**

*S. albidoflavus* amplicon NGS. Condition 4. Barcode sequence indicated by the orange region. Upper graph: percentage of reads showing a specific deletion/insertion. Lower graph: percentage of reads showing a specific base pair change. ~78100 read depth.

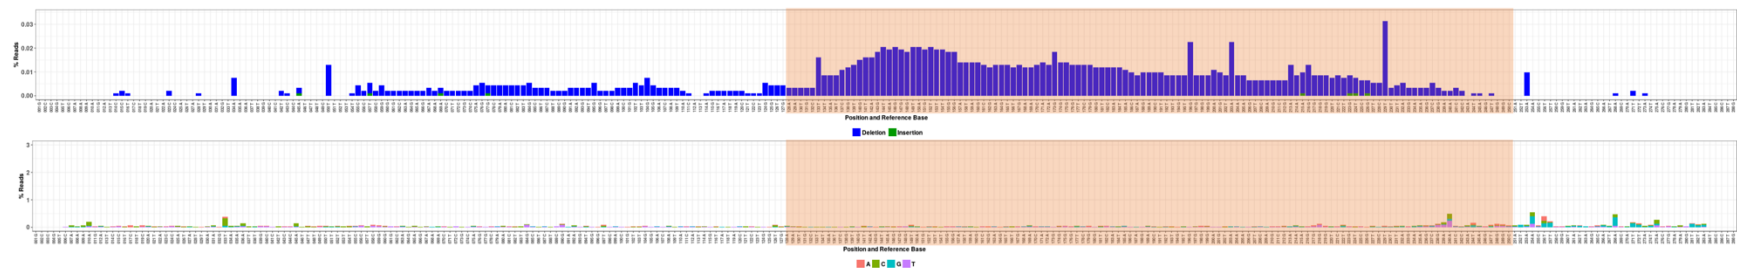

**Supplementary Fig. 26.**

*S. cerevisiae* amplicon NGS. Glycerol control. Barcode sequence indicated by the orange region. Upper graph: percentage of reads showing a specific deletion/insertion. Lower graph: percentage of reads showing a specific base pair change. ~91500 read depth.



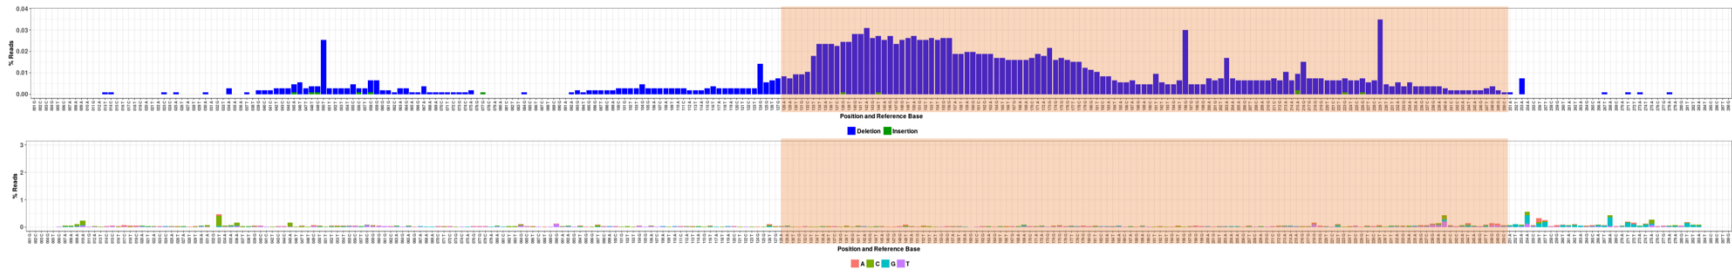

**Supplementary Fig. 27.**

*S. cerevisiae* amplicon NGS. Condition 1. Barcode sequence indicated by the orange region. Upper graph: percentage of reads showing a specific deletion/insertion. Lower graph: percentage of reads showing a specific base pair change. ~105000 read depth.

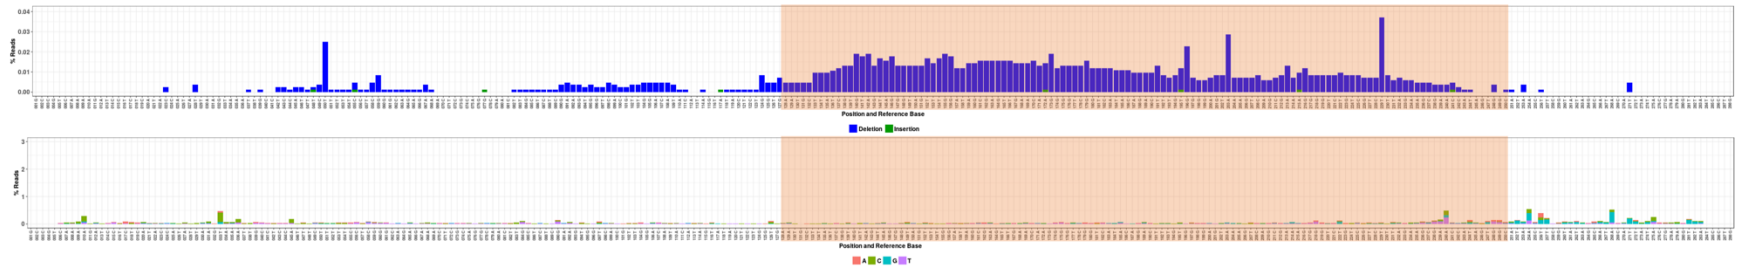

**Supplementary Fig. 28.**

*S. cerevisiae* amplicon NGS. Condition 2. Barcode sequence indicated by the orange region. Upper graph: percentage of reads showing a specific deletion/insertion. Lower graph: percentage of reads showing a specific base pair change. ~82600 read depth.

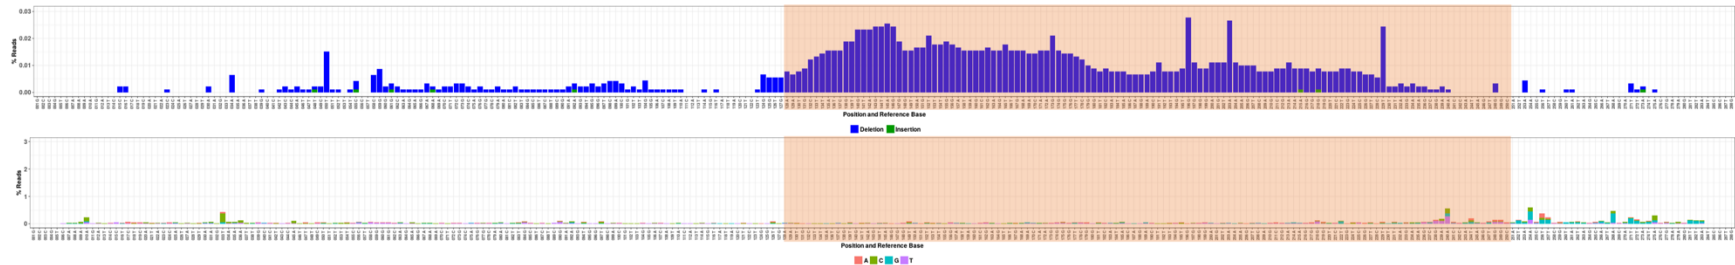

**Supplementary Fig. 29.**

*S. cerevisiae* amplicon NGS. Condition 3. Barcode sequence indicated by the orange region. Upper graph: percentage of reads showing a specific deletion/insertion. Lower graph: percentage of reads showing a specific base pair change. ~89000 read depth.

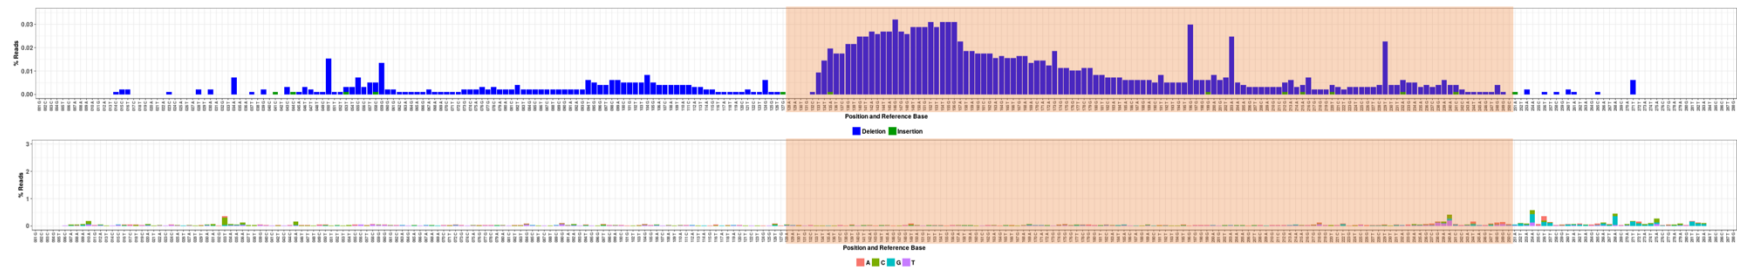

**Supplementary Fig. 30.**

*S. cerevisiae* amplicon NGS. Condition 4. Barcode sequence indicated by the orange region. Upper graph: percentage of reads showing a specific deletion/insertion. Lower graph: percentage of reads showing a specific base pair change. ~95500 read depth.

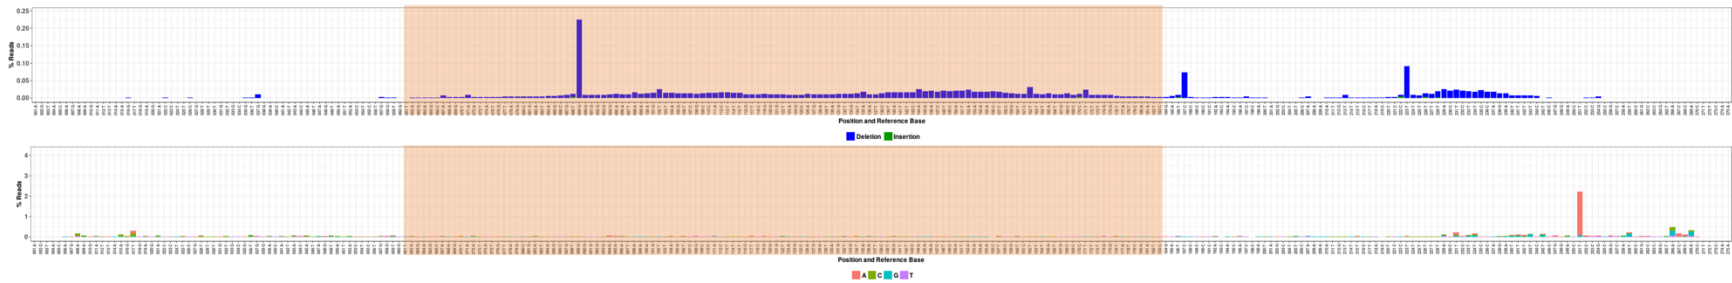

**Supplementary Fig. 31.**

*K. phaffii* amplicon NGS. Glycerol control. Barcode sequence indicated by the orange region. Upper graph: percentage of reads showing a specific deletion/insertion. Lower graph: percentage of reads showing a specific base pair change. ~73000 read depth.

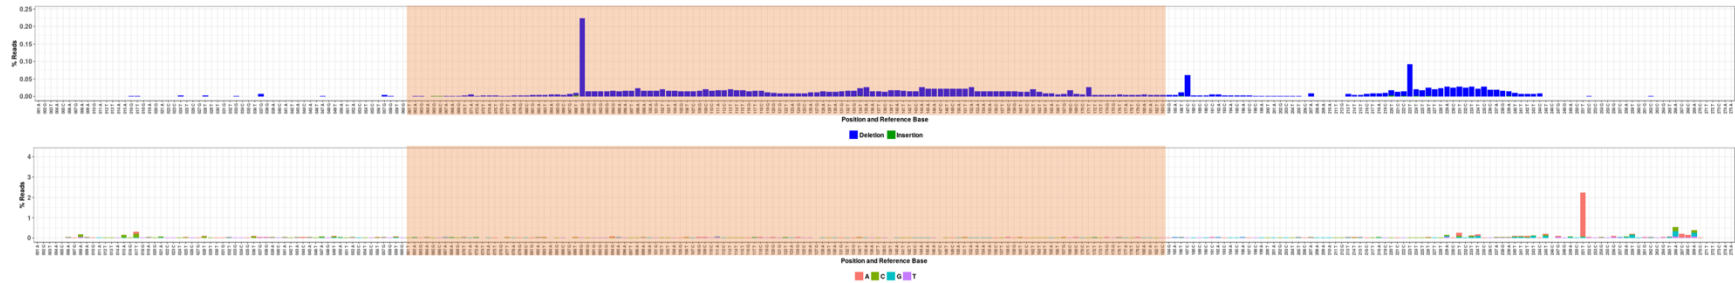

**Supplementary Fig. 32.**

*K. phaffii* amplicon NGS. Condition 1. Barcode sequence indicated by the orange region. Upper graph: percentage of reads showing a specific deletion/insertion. Lower graph: percentage of reads showing a specific base pair change. ~82900 read depth.

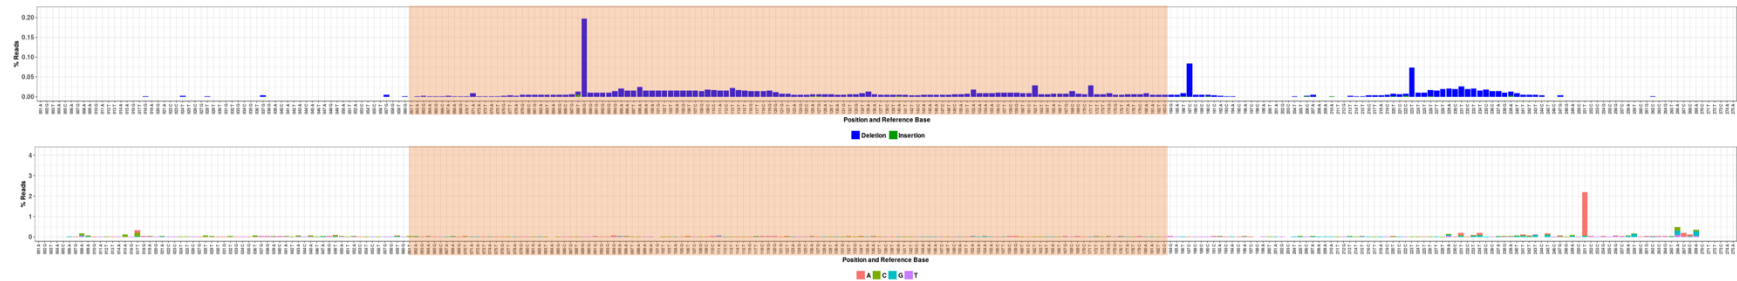

**Supplementary Fig. 33.**

*K. phaffii* amplicon NGS. Condition 2. Barcode sequence indicated by the orange region. Upper graph: percentage of reads showing a specific deletion/insertion. Lower graph: percentage of reads showing a specific base pair change. ~85400 read depth.

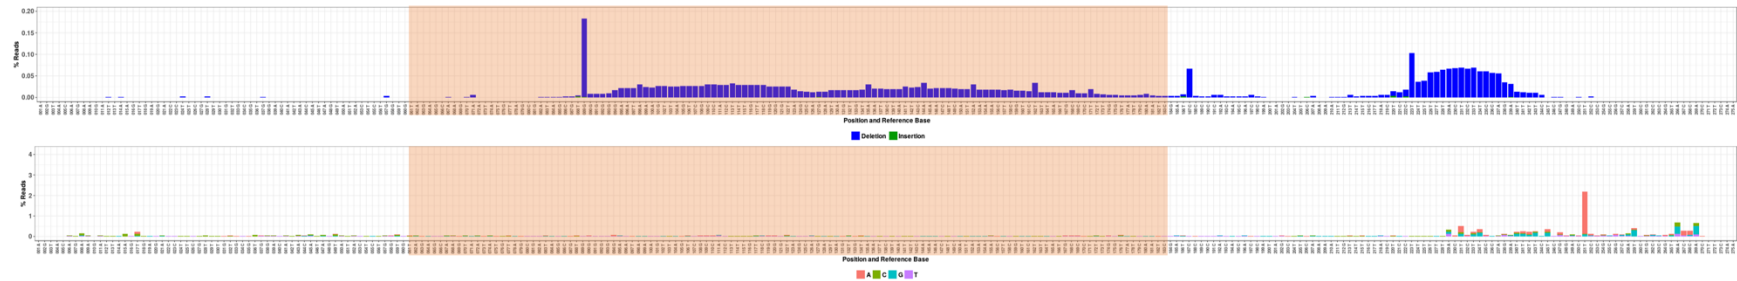

**Supplementary Fig. 34.**

*K. phaffii* amplicon NGS. Condition 3. Barcode sequence indicated by the orange region. Upper graph: percentage of reads showing a specific deletion/insertion. Lower graph: percentage of reads showing a specific base pair change. ~90600 read depth.



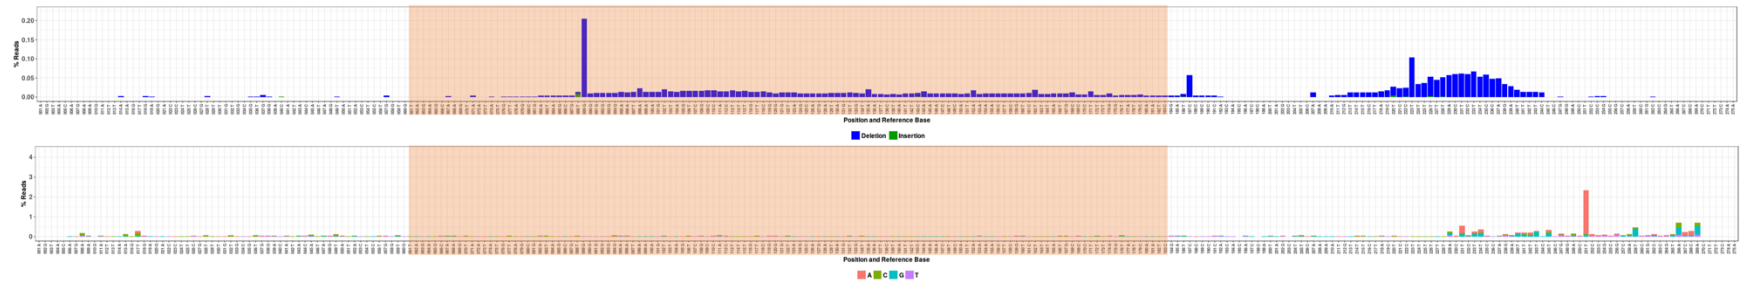

**Supplementary Fig. 35.**

*K. phaffii* amplicon NGS. Condition 4. Barcode sequence indicated by the orange region. Upper graph: percentage of reads showing a specific deletion/insertion. Lower graph: percentage of reads showing a specific base pair change. ~84600 read depth.

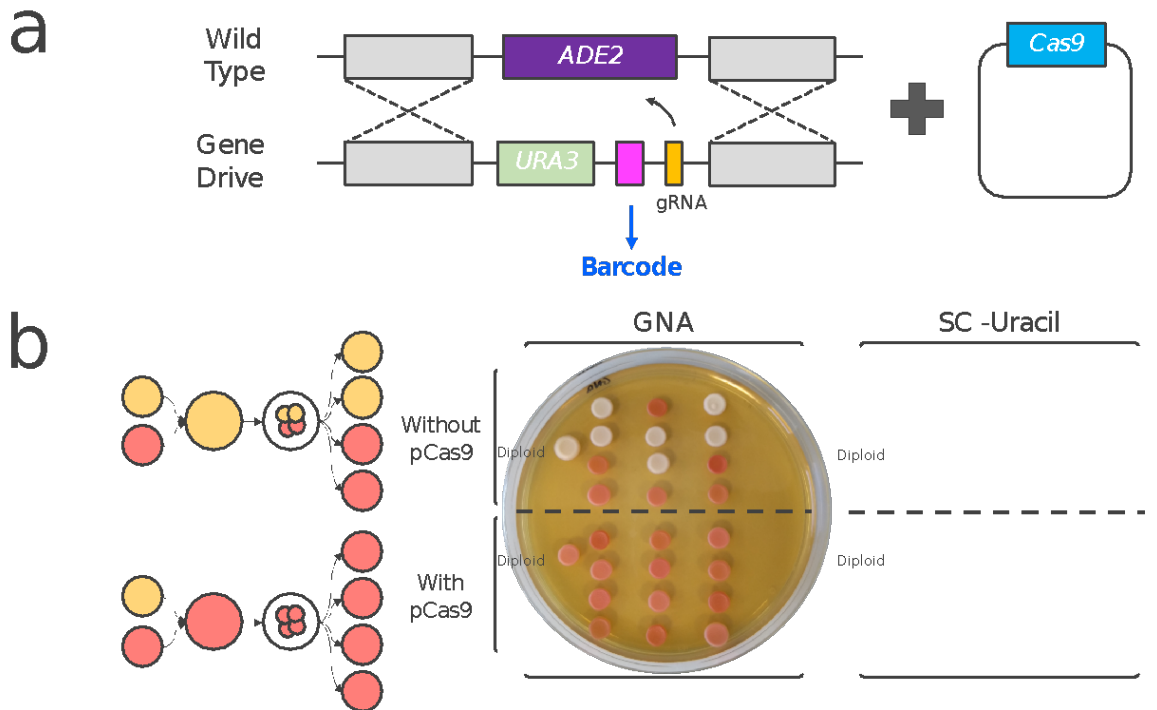

**Supplementary Fig. 36.**

Gene drive experiment in *S. cerevisiae*. a) Graphic representation of the gene drive mechanism used to propagate a barcode. A haploid strain (gene drive) containing a deletion of *ADE2* gene substituted by *URA3* marker, the barcode sequence and a gRNA targeting *ADE2* is mated with a wild type strain of the other sex. In the presence of a plasmid carrying the Cas9 gene, the CRISPR machinery edits the *ADE2* gene propagating the desired barcoded phenotype (red colonies, uracil auxotrophic). b) Yeast gene drive experiment results. Haploid cells containing the gene drive cassette were mated with wild type cells in the presence of Cas9. The diploid cells resulting from this were allowed to sporulate and the tetrads were dissected. When Cas9 was not present, the barcoded cassette was inherited by 50% of the final haploid population. When Cas9 was present, the drive allowed the copy of *URA3* gene and the barcode DNA in all the spores.

**Supplementary Table 1.**

Putative essential gene list of *S. albidoflavus*. Locus tag names from NCBI accession number CP004370.1.

|          |          |          |          |
|----------|----------|----------|----------|
| XNR_0060 | XNR_4623 | XNR_2921 | XNR_1124 |
| XNR_5409 | XNR_4512 | XNR_2567 | XNR_1072 |
| XNR_5408 | XNR_4358 | XNR_2566 | XNR_1004 |
| XNR_5406 | XNR_4333 | XNR_3654 | XNR_0818 |
| XNR_5375 | XNR_4331 | XNR_3700 | XNR_0712 |
| XNR_5370 | XNR_5405 | XNR_3750 | XNR_0710 |
| XNR_5365 | XNR_1843 | XNR_3763 | XNR_0462 |
| XNR_5364 | XNR_1908 | XNR_3772 | XNR_0461 |
| XNR_5357 | XNR_2086 | XNR_3784 | XNR_4832 |
| XNR_5356 | XNR_2129 | XNR_3870 | XNR_0281 |
| XNR_5355 | XNR_3512 | XNR_3872 | XNR_0772 |
| XNR_5354 | XNR_3475 | XNR_4145 | XNR_1514 |
| XNR_5276 | XNR_3473 | XNR_1479 | XNR_5582 |
| XNR_5171 | XNR_3434 | XNR_1247 | XNR_5368 |
| XNR_5062 | XNR_3431 | XNR_1238 | XNR_5367 |
| XNR_5040 | XNR_2759 | XNR_1196 | XNR_0715 |
| XNR_4886 | XNR_3194 | XNR_1164 | XNR_0714 |
| XNR_4775 | XNR_3034 | XNR_1141 |          |

**Supplementary Table 2.**

Plasmids used in this study. Restriction sites used to linearize the vectors are shown in italics. (\*) Two different plasmids were built with two sgRNA sequences.

| Target species     | Task             | Plasmid Name    | Markers                      | Information                                                                                                                                             | Reference  |
|--------------------|------------------|-----------------|------------------------------|---------------------------------------------------------------------------------------------------------------------------------------------------------|------------|
| <i>E. coli</i>     | λ-Red            | pKD46           | Ampicillin                   | λ-red genes under pBad promoter, temperature-sensitive                                                                                                  | 1          |
|                    |                  | pCP20           | Ampicillin / Chloramphenicol | FLP recombinase, temperature-sensitive                                                                                                                  | 1          |
|                    |                  | pKD4            | Ampicillin / Kanamycin       | R6K-γ ori, Kanamycin resistance gene between FRT sequences                                                                                              | 1          |
|                    |                  | pEC-Red2        | Ampicillin / Chloramphenicol | From pKD4. cat gene between FRT sites, homologous arms. BamHI                                                                                           | This study |
|                    |                  | pEC-Red2-BC     | Ampicillin / Chloramphenicol | Barcoded pEC-Red2                                                                                                                                       | This study |
|                    | CRISPR           | pREDCas9        | Spectinomycin                | Constitutive Cas9 expression, λ-red genes under IPTG inducible promoter, sgRNA targeting pUC origin under pBAD promoter, temperature-sensitive replicon | 2          |
|                    |                  | pEC-CRISPR2     | Ampicillin                   | pUC origin, gRNA and homologous arms targeting barcoding region. SphI                                                                                   | This study |
|                    |                  | pEC-CRISPR2-BC* | Ampicillin                   | Barcoded pEC-CRISPR2                                                                                                                                    | This study |
| <i>B. subtilis</i> | Cre-Lox          | pBS-CreLox2     | Spectinomycin / Zeocin       | ZeoR gene between loxP sites and homologous arms. SpeI                                                                                                  | This study |
|                    |                  | pBS-CreLox2-BC  | Spectinomycin / Zeocin       | A barcoded version of pBS-CreLox2                                                                                                                       | This study |
|                    |                  | pDR244          | Spectinomycin / Ampicillin   | Cre recombinase expression, temperature-sensitive.                                                                                                      | 5          |
|                    | CRISPR           | pJOE8999.1      | Kanamycin                    | Cas9 under mannose inducible promoter, sgRNA under constitutive promoter, temperature-sensitive                                                         | 6          |
|                    |                  | pBS-CRISPR2     | Kanamycin                    | From pJOE8999.1. sgRNA under strong pVeg promoter, homologous arms, temperature-sensitive. SpeI                                                         | This study |
|                    |                  | pBS-CRISPR2-BC  | Kanamycin                    | From pBS-CRISPR2. Barcoded.                                                                                                                             | This study |
| <i>P. putida</i>   | CRISPR/targetron | pSEVA421-Cas9tr | Streptomycin/ Spectinomycin  | pSEVA421 derivative bearing the cas9 gene and tracrRNA; oriV (RK2)                                                                                      | 10         |
|                    |                  | pSEVA231-C-94a  | Kanamycin                    | pSEVA231 derivative bearing the CRISPR array and spacer                                                                                                 | 9,10       |

|                          |                   |                       |                          |                                                                                     |                                                                |
|--------------------------|-------------------|-----------------------|--------------------------|-------------------------------------------------------------------------------------|----------------------------------------------------------------|
|                          |                   |                       |                          | to counterselect intron-barcode insertion; oriV (pBBR1)                             |                                                                |
|                          |                   | pSEVA6511-GIli        | Gentamycin               | L1.LtrB expression plasmid under control of ChnR/pChnB promoter.; oriV(RSF1010)     | Velázquez et al, in preparation.                               |
|                          |                   | pSEVA6511-GIli-BC     | Gentamycin               | pSEVA6511-GIli derivative with Barcode inserted in MluI site inside L1.LtrB         | This study                                                     |
| <i>S. albi dofl avus</i> | CRISPR            | pCRISPomyces-2        | Apramycin                | Constitutive expression of Cas and sgRNA                                            | 13                                                             |
|                          |                   | pSA-CRISPR            | Apramycin                | From pCRISPomyces-2. Homologous regions and gRNA for barcoding. SpeI                | This study                                                     |
|                          |                   | pSA-CRISPR-BC*        | Apramycin                | Barcoded pSA-CRISPR                                                                 | This study                                                     |
| <i>S. cerevisiae</i>     | Cre-Lox           | pCfB2899              | Ampicillin               | Homologous regions targeting Chr X. ADH1 and CYC1 terminators between arms.         | 16                                                             |
|                          |                   | pSC                   | Ampicillin               | From pCfB2899. Terminators removed. EcoRI                                           | This study                                                     |
|                          |                   | pSC-CreLox            | Ampicillin / KanMX       | From pSC. KanMX (also <i>URA3</i> variant) between loxP sites. EcoRI                | This study                                                     |
|                          |                   | pSC-CreLox-BC         | Ampicillin / KanMX       | Barcoded pSC-CreLox                                                                 | This study                                                     |
|                          |                   | pBF3060               | Ampicillin / <i>URA3</i> | CreA gene under GAL1 promoter                                                       | 15                                                             |
|                          |                   | pBF3060_NatMX         | Ampicillin / NatMX       | From pBF3060. <i>URA3</i> substituted by NatMX                                      | This study                                                     |
|                          | CRISPR            | pCfBf2312             | Ampicillin / KanMX       | Cas9 under TEF1 promoter                                                            | 16                                                             |
|                          |                   | pCfBf3020             | Ampicillin / NatMX       | sgRNA under SNR52 promoter                                                          | 16                                                             |
|                          |                   | pSC-CRISPR-BC         | Ampicillin               | From pSC. Barcoded.                                                                 | This study                                                     |
|                          | Gene Drive        | pGD-ADE2              | Ampicillin / <i>URA3</i> | <i>ADE2</i> homologous regions, sgRNA under SNR52 promoter, <i>URA3</i> , barcoded. | This study                                                     |
|                          |                   | pXP622                | Ampicillin / <i>LEU2</i> | <i>LEU2</i> marker                                                                  | 15                                                             |
|                          | <i>K. phaffii</i> | <i>AOX1</i> insertion | pICXNH3                  | Zeocin / Chloramphenicol                                                            | ccdB and Cat genes between <i>AOX1</i> promoter and terminator |
| pPP                      |                   |                       | Zeocin                   | From pICXNH3, ccdB and Cat removed. BamHI                                           | This study                                                     |
| pPP-BC                   |                   |                       | Zeocin                   | From pPP, barcoded                                                                  | This study                                                     |

**Supplementary Table 3.**

Barcoding site description and barcode sequence information.

| Species (strain)               | NCBI accession        | Left gene (orientation)        | Right gene (orientation) | Barcode sequence                                                                                                                                                                                                                                                                  |
|--------------------------------|-----------------------|--------------------------------|--------------------------|-----------------------------------------------------------------------------------------------------------------------------------------------------------------------------------------------------------------------------------------------------------------------------------|
| <i>E. coli</i> (BW25113)       | CP009273.1            | <i>pyrH</i> (+)                | <i>frt</i> (+)           | GTCGTGTCTGTCAATATCGGGGATAATAAATGTAGAT<br>AATGATTTTCGTCAAGTCCTTACCCCGACTATACAACAG<br>CAATCCATAGTAATCTGTGCGAATGGTTTAGTAGGAC<br>ATAACACAAAT                                                                                                                                          |
| <i>B. subtilis</i> (168)       | AL009126.1            | <i>rpsD</i> (+)                | <i>tyrS</i> (-)          | CTTACTATGCCACATAGTCTAACTACTTTGCGTAGGTA<br>ATAGAGCAACGAGTAGGGTTATCGTCTTTCATACTCG<br>GTTGGCGATTATACAAACTCCAATGGTTTGATTGGTGT<br>TTTCATACG                                                                                                                                            |
| <i>P. putida</i> (EM383)       | AE015451.2 (modified) | <i>Hypothetical PP5408</i> (-) | <i>glmS</i> (-)          | CAGAGTGCCGATATAGACCCAAATGGTCTTTACCTTTC<br>AACGACAATAATGTGCGAACGCTATCTCAACGCCAAC<br>ACTATTGGCGTTAGTCGGTTGCCATAGTTAGTAGCACA<br>GCACATTAGC                                                                                                                                           |
| <i>S. albidoflavus</i> (J1074) | CP004370.1            | <i>XNR_3871</i> (-)            | <i>XNR_3872</i> (+)      | GTTCCGGTCTGTCTTACTGCTCCATTTTCTCGTCAATAA<br>TGCCATACCAACGAGTAAAGGGTATATGAAAGGAGT<br>GGATTTACATCGTATCTCCCATAGACTTTCACATTT<br>GTTGTAGTG                                                                                                                                              |
| <i>S. cerevisiae</i> (BY4742)  | CP026288.1            | <i>NCA3</i> (-)                | <i>ASF1</i> (+)          | AATGCTTATCGTGTAGTAGGGTAGTTGGATAGCGAG<br>TTGAACAAGGGGTCGGTCATACAGACTTTGTGGGGAG<br>TAAAGTCAGCGAAAGGGTCTGTCTGCTTTAGAAGCG<br>AACCATAGTGGC<br>ATTGGGGTGGTTCGTCATATGTGTAGAGCGTTGTGAGT<br>AAGTTATTGAGTTCAACGGGGCAAATCTTTATATTGGG<br>GATAACTAAAGTCAATGCGAACCATAGTTGAACTAAC<br>TTGGGGGAGAG |
| <i>K. phaffii</i> (GS115)      | FN392322              | <i>AOX1</i> (-)                | <i>PAO</i> (+)           | TAGAGCAAGTAATATGTAGCGATAGCGTGGGGGAAT<br>AAAGTTAGTCGCCACTTTGTCTGGGTAGCAGATAGTGT<br>AATCTATTCAAACCTCATAAACTCGTCTTTATGCCCTT<br>TGGTATCAATC                                                                                                                                           |

**Supplementary Table 4.**

Primers used to sequence the barcoded PCR amplicon. The Illumina adapter sequences appear in bold.

| <b>Species</b>         | <b>Primer</b> | <b>Sequence</b>                                              |
|------------------------|---------------|--------------------------------------------------------------|
| <i>E. coli</i>         | BC_482        | ACACTCTTCCCTACACGACGCTCTTCCGATCTCCGTGGTAATGGGTGAAA           |
|                        | BC_483        | GACTGGAGTTCAGACGTGTGCTCTTCCGATCTCGGGTAATCGTCTGGATTATTAGG     |
| <i>B. subtilis</i>     | BC_498        | ACACTCTTCCCTACACGACGCTCTTCCGATCTGCAATCGTACACATGAGATTAC       |
|                        | BC_499        | GACTGGAGTTCAGACGTGTGCTCTTCCGATCTAGATCCTTGCCACTGAAGG          |
| <i>P. putida</i>       | BC_500        | ACACTCTTCCCTACACGACGCTCTTCCGATCTCGATGACAATGAAAGCATACAACAAGAG |
|                        | BC_501        | GACTGGAGTTCAGACGTGTGCTCTTCCGATCTATATTTATTACGTGGCGACGCGT      |
| <i>S. albidoflavus</i> | BC_502        | ACACTCTTCCCTACACGACGCTCTTCCGATCTCAGGAGGTTGCGATGAAAGA         |
|                        | BC_503        | GACTGGAGTTCAGACGTGTGCTCTTCCGATCTGAATCTGGGCGCTCATACC          |
| <i>S. cerevisiae</i>   | BC_504        | ACACTCTTCCCTACACGACGCTCTTCCGATCTCGGAGATGGCGCATCTATTT         |
|                        | BC_505        | GACTGGAGTTCAGACGTGTGCTCTTCCGATCTCCTCTGTGAGGCCGATTATG         |
| <i>K. phaffii</i>      | BC_506        | ACACTCTTCCCTACACGACGCTCTTCCGATCTGGTATTTCCCACTCCTCTTCAG       |
|                        | BC_507        | GACTGGAGTTCAGACGTGTGCTCTTCCGATCTTATGCTGTGCTTGGGTGTT          |

**Supplementary Table 5.**

The efficiency of the described barcoding methods used in this article for each species. All the experiments were carried out in three different replicas. After transformation with the PCR product/plasmid colonies were boiled and used as PCR template. The table shows how many positive clones were obtained in all experiments out of the number of tested colonies.

| <b>Species</b>         | <b>Method</b>         | <b>Replica 1</b> | <b>Replica 2</b> | <b>Replica 3</b> | <b>Average efficiency</b> |
|------------------------|-----------------------|------------------|------------------|------------------|---------------------------|
| <i>E. coli</i>         | $\lambda$ -Red        | 7 / 8            | 7 / 8            | 8 / 8            | 92%                       |
|                        | CRISPR gRNA1          | 8 / 8            | 8 / 8            | 8 / 8            | 100%                      |
|                        | CRISPR gRNA2          | 8 / 8            | 7 / 8            | 7 / 8            | 92%                       |
| <i>B. subtilis</i>     | Cre-Lox               | 8 / 8            | 7 / 8            | 8 / 8            | 96%                       |
|                        | T/AT                  | 7 / 7            | 8 / 8            | 7 / 8            | 92%                       |
|                        | CRISPR                | 6 / 8            | 7 / 8            | 7 / 8            | 83%                       |
| <i>P. putida</i>       | CRISPR/targetron      | 8/9              | 3/8              | 3/8              | 55%                       |
| <i>S. albidoflavus</i> | CRISPR gRNA1          | 5 / 6            | 2 / 4            | 5 / 5            | 77%                       |
|                        | CRISPR gRNA2          | 5 / 7            | 3 / 5            | 2 / 3            | 66%                       |
| <i>S. cerevisiae</i>   | Cre-Lox               | 8 / 8            | 7 / 8            | 6 / 6            | 96%                       |
|                        | CRISPR                | 7 / 8            | 7 / 8            | 8 / 8            | 92%                       |
| <i>K. phaffii</i>      | <i>AOX1</i> insertion | 8 / 8            | 7 / 8            | 7 / 7            | 96%                       |



**Supplementary Table 6.**

CellRepo links of the barcoded strains in this study.

| Species                | Link to CellRepo                                                                                                                                          | QR code                                                                               |
|------------------------|-----------------------------------------------------------------------------------------------------------------------------------------------------------|---------------------------------------------------------------------------------------|
| <i>E. coli</i>         | <a href="https://cellrepo.ico2s.org/repositories/59?branch_id=82&amp;locale=en">https://cellrepo.ico2s.org/repositories/59?branch_id=82&amp;locale=en</a> |    |
| <i>B. subtilis</i>     | <a href="https://cellrepo.ico2s.org/repositories/60?branch_id=85&amp;locale=en">https://cellrepo.ico2s.org/repositories/60?branch_id=85&amp;locale=en</a> |    |
| <i>P. putida</i>       | <a href="https://cellrepo.ico2s.org/repositories/61?branch_id=89&amp;locale=en">https://cellrepo.ico2s.org/repositories/61?branch_id=89&amp;locale=en</a> |    |
| <i>S. albidoflavus</i> | <a href="https://cellrepo.ico2s.org/repositories/62?branch_id=91&amp;locale=en">https://cellrepo.ico2s.org/repositories/62?branch_id=91&amp;locale=en</a> |   |
| <i>S. cerevisiae</i>   | <a href="https://cellrepo.ico2s.org/repositories/65?branch_id=96&amp;locale=en">https://cellrepo.ico2s.org/repositories/65?branch_id=96&amp;locale=en</a> |  |
| <i>K. phaffii</i>      | <a href="https://cellrepo.ico2s.org/repositories/64?branch_id=94&amp;locale=en">https://cellrepo.ico2s.org/repositories/64?branch_id=94&amp;locale=en</a> |  |

**Sequencing results:**

P-values were automatically calculated by Geneious 2019 using binomial distribution as described in the user manual (<https://assets.geneious.com/documentation/geneious/GeneiousPrimeManual2019.2.pdf>).

**Supplementary Table 7.** Sequencing statistics (upper table) and mutation analysis (lower table) of *E. coli* clones barcoded using Lambda-Red and CRISPR (using two different gRNAs) and compared against BW25113 reference genome (CP009273.1).

| Method         | Strain | Length (bp) | Sequences  | Identical sites   | Pairwise identity | Coverage Mean | Coverage Std Dev | Coverage Min | Coverage Max |
|----------------|--------|-------------|------------|-------------------|-------------------|---------------|------------------|--------------|--------------|
| Lambda-Red     | 1      | 4,632,808   | 11,812,588 | 3,983,330 (86.0%) | 99.90%            | 371.3         | 64.6             | 0            | 769          |
|                | 2      | 4,633,255   | 14,409,073 | 3,841,995 (82.9%) | 99.90%            | 451.6         | 72.8             | 0            | 953          |
|                | 3      | 4,632,898   | 11,804,172 | 3,957,826 (85.4%) | 99.90%            | 369.8         | 59.6             | 0            | 829          |
| CRISPR sgRNA 1 | 1      | 4,632,569   | 9,274,681  | 4,125,954 (89.1%) | 99.90%            | 291.2         | 46.6             | 0            | 707          |
|                | 2      | 4,632,629   | 10,777,258 | 4,003,022 (86.4%) | 99.90%            | 337.4         | 52.7             | 0            | 784          |
|                | 3      | 4,632,851   | 11,579,032 | 4,046,097 (87.3%) | 99.90%            | 363.9         | 56.2             | 0            | 809          |
| CRISPR sgRNA 2 | 1      | 4,632,850   | 13,309,565 | 3,885,625 (83.9%) | 99.90%            | 416.9         | 61.1             | 0            | 955          |
|                | 2      | 4,632,556   | 9,193,478  | 4,079,340 (88.1%) | 99.90%            | 288           | 45.5             | 0            | 653          |
|                | 3      | 4,632,559   | 8,974,523  | 4,144,709 (89.5%) | 99.90%            | 282.4         | 44.9             | 0            | 649          |

| Method         | Strain | Minimum   | Maximum   | Change | Type             | Coverage | Variant frequency | P-value | CDS name   | Codon Change | AA change | Protein Effect |
|----------------|--------|-----------|-----------|--------|------------------|----------|-------------------|---------|------------|--------------|-----------|----------------|
| Lambda-Red     | 1      | 1,952,708 | 1,952,708 | C -> T | SNP (transition) | 315      | 100.00%           | 0       | Intergenic | ---          | ---       | ---            |
|                | 2      | 1,952,708 | 1,952,708 | C -> T | SNP (transition) | 341      | 100.00%           | 0       | Intergenic | ---          | ---       | ---            |
|                | 3      | 1,952,708 | 1,952,708 | C -> T | SNP (transition) | 317      | 100.00%           | 0       | Intergenic | ---          | ---       | ---            |
| CRISPR sgRNA 1 | 1      | None      |           |        |                  |          |                   |         |            |              |           |                |
|                | 2      | None      |           |        |                  |          |                   |         |            |              |           |                |
|                | 3      | 2,016,625 | 2,016,625 | T -> G | SNP (transition) | 297      | 100.00%           | 0       | fliR CDS   | CTT -> CTG   |           | None           |
| CRISPR sgRNA 2 | 1      | None      |           |        |                  |          |                   |         |            |              |           |                |
|                | 2      | None      |           |        |                  |          |                   |         |            |              |           |                |
|                | 3      | 3,531,572 | 3,531,572 | G -> T | SNP (transition) | 460      | 100.00%           | 0       | yhgF CDS   | GGC -> TGC   | G -> C    | Substitution   |

**Supplementary Table 8.**

Sequencing statistics (upper table) and mutation analysis (lower table) of *B. subtilis* clones barcoded using three different methods and compared against 168 reference genome (AL009126.1).

| Method  | Strain | Length    | Sequences  | Identical sites   | Pairwise identity | Coverage Mean | Coverage Std Dev | Coverage Min | Coverage Max |
|---------|--------|-----------|------------|-------------------|-------------------|---------------|------------------|--------------|--------------|
| Cre-Lox | 1      | 4,217,349 | 10,795,770 | 3,601,061 (85.4%) | 99.90%            | 369.3         | 53.2             | 0            | 1242         |
|         | 2      | 4,217,213 | 9,229,938  | 3,724,674 (88.3%) | 99.90%            | 316.8         | 54.6             | 0            | 1197         |
|         | 3      | 4,217,457 | 10,391,000 | 3,714,984 (88.1%) | 99.90%            | 357.5         | 58.3             | 0            | 994          |
| CRISPR  | 1      | 4,217,215 | 10,496,279 | 3,366,442 (79.8%) | 99.90%            | 357.7         | 41.8             | 0            | 1469         |
|         | 2      | 4,217,330 | 11,354,246 | 3,426,110 (81.2%) | 99.90%            | 388.9         | 43.7             | 0            | 1432         |
|         | 3      | 4,217,375 | 10,318,738 | 3,443,869 (81.7%) | 99.90%            | 352.8         | 41.2             | 0            | 1498         |
| T/TA    | 1      | 4,217,314 | 11,466,520 | 3,381,751 (80.2%) | 99.90%            | 392.2         | 43               | 0            | 1476         |
|         | 2      | 4,217,454 | 13,153,649 | 3,275,819 (77.7%) | 99.90%            | 449.3         | 52.5             | 0            | 1826         |
|         | 3      | 4,217,545 | 11,992,540 | 3,365,142 (79.8%) | 99.90%            | 410.2         | 47.2             | 0            | 1290         |

| Method  | Strain | Minimum   | Maximum   | Change | Type               | Coverage | Variant frequency | P-value | CDS name | Codon Change | AA change | Protein Effect |
|---------|--------|-----------|-----------|--------|--------------------|----------|-------------------|---------|----------|--------------|-----------|----------------|
| Cre-Lox | 1      | 2,123,739 | 2,123,739 | T -> A | SNP (transversion) | 289      | 77.50%            | 0       | yojE CDS | ATA -> TTA   | I -> L    | Substitution   |
|         | 2      | None      |           |        |                    |          |                   |         |          |              |           |                |
|         | 3      | 2,625,604 | 2,625,604 | G -> T | SNP (transversion) | 312      | 100.00%           | 0       | dnaJ CDS | GGC -> GGA   |           | None           |
| CRISPR  | 1      | None      |           |        |                    |          |                   |         |          |              |           |                |
|         | 2      | None      |           |        |                    |          |                   |         |          |              |           |                |
|         | 3      | None      |           |        |                    |          |                   |         |          |              |           |                |
| T/TA    | 1      | None      |           |        |                    |          |                   |         |          |              |           |                |
|         | 2      | None      |           |        |                    |          |                   |         |          |              |           |                |
|         | 3      | None      |           |        |                    |          |                   |         |          |              |           |                |

**Supplementary Table 9.**

Sequencing statistics (upper table) and mutation analysis (lower table) of *P. putida* clones barcoded CRISPR/targetron method and compared against EM383 reference genome (a modified version of AE015451.2).

| Method           | Strain | Length    | Sequences  | Identical sites   | Pairwise identity | Coverage Mean | Coverage Std Dev | Coverage Min | Coverage Max |
|------------------|--------|-----------|------------|-------------------|-------------------|---------------|------------------|--------------|--------------|
| CRISPR/targetron | 1      | 5,913,473 | 13,587,360 | 4,824,315 (81.6%) | 99.80%            | 332.8         | 39.8             | 4            | 1290         |
|                  | 2      | 5,913,390 | 12,875,395 | 4,925,599 (83.3%) | 99.80%            | 316.1         | 34.2             | 8            | 1093         |

| Method           | Strain | Minimum   | Maximum   | Change                                                                                             | Type                      | Coverage | Variant frequency | P-value  | CDS name | Codon Change | AA change | Protein Effect |
|------------------|--------|-----------|-----------|----------------------------------------------------------------------------------------------------|---------------------------|----------|-------------------|----------|----------|--------------|-----------|----------------|
| CRISPR/targetron | 1      | 3,047,795 | 3,047,881 | -<br>AGTGGCCCGGACTCTGGAGGGCACCCAAGGA<br>TCGGCCCTGGCAATACAGGA1CTGGAATAC<br>TGGACGGACTGGCCAGGT1GCTTG | Deletion                  | 253      | 100.00%           | 0.00E+00 | dmoA-I   | Deletion     |           |                |
|                  | 2      | 1,078,836 | 1,078,835 | (C)4 -> (C)5                                                                                       | Insertion (tandem repeat) | 344      | 93.00%            | 0.00E+00 | cafA CDS | Frame Shift  |           |                |

**Supplementary Table 10.**

Sequencing statistics (upper table) and mutation analysis (lower table) of *S. cerevisiae* clones barcoded using two methods and compared against BY4742 reference genome (GenBank assembly accession: GCA\_003086655.1).

| Method  | Strain | Length     | Sequences | Identical sites    | Pairwise identity | Coverage Mean | Coverage Std Dev | Coverage Min | Coverage Max |
|---------|--------|------------|-----------|--------------------|-------------------|---------------|------------------|--------------|--------------|
| Cre-Lox | 1      | 12,177,589 | 7,566,425 | 11,725,736 (96.3%) | 99.90%            | 89.5          | 113.3            | 0            | 4841         |
|         | 2      | 12,178,378 | 8,353,507 | 11,685,184 (96.0%) | 99.90%            | 98.7          | 124.2            | 0            | 4972         |
|         | 3      | 12,179,100 | 9,626,768 | 11,556,364 (94.9%) | 99.90%            | 113.2         | 125.3            | 0            | 5208         |
| CRISPR  | 1      | 12,177,604 | 6,969,487 | 11,721,633 (96.3%) | 99.90%            | 82            | 117.6            | 0            | 3623         |
|         | 2      | 12,180,145 | 9,615,749 | 11,597,471 (95.2%) | 99.90%            | 113.4         | 161              | 0            | 6794         |
|         | 3      | 12,178,498 | 7,698,946 | 11,697,279 (96.1%) | 99.90%            | 90.6          | 131.7            | 0            | 4013         |

| Method  | Strain | Chromosome | Minimum | Maximum | Change           | Type                      | Coverage   | Variant frequency | P-value   | CDS name   | Codon Change | AA change | Protein Effect |
|---------|--------|------------|---------|---------|------------------|---------------------------|------------|-------------------|-----------|------------|--------------|-----------|----------------|
| Cre-Lox | 1      | None       |         |         |                  |                           |            |                   |           |            |              |           |                |
|         | 2      | X          | 343,105 | 343,105 | A -> G           | SNP (transition)          | 109        | 100.00%           | 0.00E+00  | MTR4       | GCA -> GCG   |           | None           |
|         | 3      | X          | 11,273  | 11,272  | (TA)13 -> (TA)15 | Insertion (tandem repeat) | 94 -> 95   | 61.7% -> 62.1%    | 6.80E-29  | Intergenic | ---          | ---       | ---            |
| CRISPR  | 1      | None       |         |         |                  |                           |            |                   |           |            |              |           |                |
|         | 2      | IX         | 11,243  | 11,246  | (TA)14 -> (TA)12 | Deletion (tandem repeat)  | 49         | 98.00%            | 4.70E-09  | Intergenic | ---          | ---       | ---            |
|         |        | IX         | 11,273  | 11,272  | (TA)13 -> (TA)15 | Insertion (tandem repeat) | 183 -> 185 | 95.1% -> 95.7%    | 1.80E-41  | Intergenic | ---          | ---       | ---            |
|         |        | XV         | 1,208   | 1,209   | (AT)12 -> (AT)11 | Deletion (tandem repeat)  | 121 -> 123 | 83.7% -> 85.1%    | 8.40E-133 | Intergenic | ---          | ---       | ---            |
|         |        | XV         | 1,233   | 1,232   | (AT)12 -> (AT)13 | Insertion (tandem repeat) | 132 -> 134 | 89.4% -> 89.6%    | 4.20E-289 | Intergenic | ---          | ---       | ---            |
|         | 3      | XVI        | 532,368 | 532,368 | C -> G           | SNP (transversion)        | 81         | 100.00%           | 3.20E-284 | Intergenic | ---          | ---       | ---            |

**Supplementary Table 11.**

Sequencing statistics (upper table) and mutation analysis (lower table) of *K. phaffii* clones barcoded using *AOXI* insertion method and compared against GS115 reference genome (GenBank assembly accession: GCA\_000027005.1).

| Method                | Strain | Length    | Sequences  | Identical sites   | Pairwise identity | Coverage Mean | Coverage Std Dev | Coverage Min | Coverage Max |
|-----------------------|--------|-----------|------------|-------------------|-------------------|---------------|------------------|--------------|--------------|
| <i>AOXI</i> insertion | 1      | 9,227,849 | 13,649,028 | 8,237,869 (89.3%) | 98.60%            | 214           | 76.5             | 0            | 7076         |
|                       | 2      | 9,222,446 | 8,752,994  | 8,714,000 (94.5%) | 98.60%            | 137.1         | 45               | 0            | 3964         |

| Method                | Strain | Chromosome | Minimum | Maximum | Change | Type               | Coverage | Variant frequency | P-value  | CDS name   | Codon Change | AA change | Protein Effect |
|-----------------------|--------|------------|---------|---------|--------|--------------------|----------|-------------------|----------|------------|--------------|-----------|----------------|
| <i>AOXI</i> insertion | 1      | None       |         |         |        |                    |          |                   |          |            |              |           |                |
|                       | 2      | II         | 908,946 | 908,946 | T -> A | SNP (transversion) | 140      | 99.30%            | 0.00E+00 | Intergenic | ---          | ---       | ---            |
|                       |        | III        | 81,689  | 81,689  | T -> G | SNP (transversion) | 152      | 100.00%           | 0.00E+00 | Intergenic | ---          | ---       | ---            |

**Supplementary Table 12.**

Sequencing statistics (upper table) and mutation analysis (lower table) of *S. albidoflavus* clones barcoded using gRNAs and compared against J1074 reference genome (CP004370.1).

| Method         | Strain | Length    | Sequences  | Identical sites   | Pairwise identity | Coverage Mean | Coverage Std Dev | Coverage Min | Coverage Max |
|----------------|--------|-----------|------------|-------------------|-------------------|---------------|------------------|--------------|--------------|
| CRISPR sgRNA 1 | 1      | 6,845,309 | 11,542,819 | 5,975,030 (87.3%) | 99.90%            | 241.7         | 61.5             | 0            | 6179         |
|                | 2      | 6,844,965 | 9,789,335  | 6,151,432 (89.9%) | 99.90%            | 206.1         | 47.1             | 0            | 5391         |
| CRISPR sgRNA 2 | 1      | 6,844,139 | 6,756,753  | 6,336,488 (92.6%) | 99.90%            | 142.1         | 33.7             | 0            | 3966         |
|                | 2      | 6,844,905 | 11,429,476 | 6,011,854 (87.8%) | 99.90%            | 239.5         | 49.1             | 0            | 5546         |
|                | 3      | 6,846,031 | 13,416,563 | 5,964,405 (87.2%) | 99.90%            | 281.9         | 56.2             | 0            | 5749         |

| Method         | Strain | Minimum   | Maximum   | Change         | Type                      | Coverage | Variant frequency | P-value   | CDS name   | Codon Change | AA change | Protein Effect |
|----------------|--------|-----------|-----------|----------------|---------------------------|----------|-------------------|-----------|------------|--------------|-----------|----------------|
| CRISPR sgRNA 1 | 1      | 4,369,426 | 4,369,426 | A -> G         | SNP (transition)          | 250      | 100.00%           | 0.00E+00  | XNR_3843   | TTC -> CTC   | F -> L    | Substitution   |
|                |        | 6,112,283 | 6,112,283 | T -> C         | SNP (transition)          | 220      | 99.50%            | 0.00E+00  | XNR_5404   | AAA -> GAA   | K -> E    | Substitution   |
|                | 2      | None      |           |                |                           |          |                   |           |            |              |           |                |
| CRISPR sgRNA 2 | 1      | 2,787,417 | 2,787,417 | T -> G         | SNP (transversion)        | 171      | 100.00%           | 0.00E+00  | Intergenic | ---          | ---       | ---            |
|                |        | 3,586,859 | 3,586,859 | T -> C         | SNP (transition)          | 170      | 100.00%           | 0.00E+00  | XNR_3149   | GAA -> GGA   | E -> G    | Substitution   |
|                |        | 4,127,513 | 4,127,513 | A -> G         | SNP (transition)          | 150      | 100.00%           | 0.00E+00  | Intergenic | ---          | ---       | ---            |
|                |        | 4,712,156 | 4,712,156 | C -> A         | SNP (transversion)        | 133      | 100.00%           | 0.00E+00  | XNR_4154   | GCC -> TCC   | A -> S    | Substitution   |
|                |        | 4,884,788 | 4,884,788 | T -> C         | SNP (transition)          | 133      | 100.00%           | 0.00E+00  | Intergenic | ---          | ---       | ---            |
|                |        | 5,804,325 | 5,804,325 | A -> G         | SNP (transition)          | 115      | 100.00%           | 0.00E+00  | Intergenic | ---          | ---       | ---            |
|                | 2      | 2,947,536 | 2,947,536 | T -> C         | SNP (transition)          | 258      | 100.00%           | 0.00E+00  | XNR_2571   | ATA -> GTA   | I -> V    | Substitution   |
|                |        | 4,761,728 | 4,761,728 | T -> C         | SNP (transition)          | 159      | 80.50%            | 0.00E+00  | Intergenic | ---          | ---       | ---            |
|                |        | 4,890,233 | 4,890,233 | T -> C         | SNP (transition)          | 304      | 99.70%            | 0.00E+00  | XNR_4299   | TTT -> TTC   | ---       | None           |
|                | 3      | 1,502,512 | 1,502,512 | A -> G         | SNP (transition)          | 347      | 61.10%            | 0.00E+00  | XNR_1249   | TTT -> TTC   | ---       | None           |
|                |        | 2,259,838 | 2,259,837 | (G)10 -> (G)11 | Insertion (tandem repeat) | 188      | 53.70%            | 8.10E-269 | Intergenic | ---          | ---       | ---            |

### Supplementary Table 13.

Sanger sequencing results of colonies after the 10 days or passes of each long-term survivability condition. Number of sequences identical to the barcode sequence/number of high-quality Sanger reactions retrieved. Important note: this was a preliminary experiment before NGS amplicon analysis, no replicas were sent for each sequencing reaction. This may explain low-quality reads and point mutations found. The discrepancies were single point mutations in all cases.

| Species                | Condition 1 | Condition 2 | Condition 3 | Condition 4 | Condition 5 |
|------------------------|-------------|-------------|-------------|-------------|-------------|
| <i>E. coli</i>         | 4/5         | 5/5         | 5/5         | 4/4         | 3/3         |
| <i>B. subtilis</i>     | 5/5         | 5/5         | 3/3         | 4/4         | 3/3         |
| <i>P. putida</i>       | 4/5         | 3/4         | 4/5         | 4/5         | 3/3         |
| <i>S. albidoflavus</i> | 2/2         | 2/3         | 4/4         | 4/4         | 3/3         |
| <i>S. cerevisiae</i>   | 5/5         | 5/5         | 3/4         | 5/5         | 3/3         |
| <i>P. pastoris</i>     | 5/5         | 5/5         | 5/5         | 4/4         | 2/3         |

## References

1. Datsenko, K. A., Wanner, B. L. & Beckwith, J. One-step inactivation of chromosomal genes in Escherichia coli K-12 using PCR products. *Proc. Natl. Acad. Sci. U. S. A.* **97**, 6640–6645 (2000).
2. Li, Y. *et al.* Metabolic engineering of Escherichia coli using CRISPR–Cas9 mediated genome editing. *Metab. Eng.* **31**, 13–21 (2015).
3. Labun, K. *et al.* CHOPCHOP v3: expanding the CRISPR web toolbox beyond genome editing. *Nucleic Acids Res.* **47**, W171–W174 (2019).
4. Lin, Z. *et al.* A versatile mini-mazF-cassette for marker-free targeted genetic modification in Bacillus subtilis. *J. Microbiol. Methods* **95**, 207–214 (2013).
5. Koo, B. M. *et al.* Construction and Analysis of Two Genome-Scale Deletion Libraries for Bacillus subtilis. *Cell Syst.* **22**, 291–305 (2017).
6. Altenbuchner, J. Editing of the Bacillus subtilis Genome by the CRISPR-Cas9 System. *Appl. Environ. Microbiol.* **82**, 5421–7 (2016).
7. Priceid, M. A., Cruz, R., Baxter, S., Escalettes, F. & Rosser, S. J. CRISPR-Cas9 In Situ engineering of subtilisin E in Bacillus subtilis. *PLoS One* **14**, e0210121 (2019).
8. Velázquez, E., Lorenzo, V. de & Al-Ramahi, Y. Recombination-Independent Genome Editing through CRISPR/Cas9-Enhanced TargeTron Delivery. *ACS Synth. Biol.* **8**, 2186–2193 (2019).
9. Velázquez, E., Al-Ramahi, Y., Tellechea, J., Krasnogor, N. & de Lorenzo, V. Targetron-Assisted Delivery of Exogenous DNA Sequences into Pseudomonas putida through CRISPR-Aided Counterselection. *ACS Synth. Biol.* **10**, 2552-2565 (2021)
10. Aparicio, T., de Lorenzo, V. & Martínez-García, E. CRISPR/Cas9-Based Counterselection Boosts Recombineering Efficiency in Pseudomonas putida. *Biotechnol. J.* **13**, 1700161 (2018).
11. Choi, K.-H. & Schweizer, H. P. mini-Tn7 insertion in bacteria with single attTn7 sites: example Pseudomonas aeruginosa. *Nat. Protoc.* **1**, 153–161 (2006).
12. Kessler, B., de Lorenzo, V. & Timmis, K. N. A general system to integrate lacZ fusions into the chromosomes of gram-negative eubacteria: regulation of the P<sub>m</sub> promoter of the TOL plasmid studied with all controlling elements in monocopy. *Mol. Gen. Genet. MGG* **233**, 293–301 (1992).
13. Cobb, R. E., Wang, Y. & Zhao, H. High-Efficiency Multiplex Genome Editing of Streptomyces Species Using an Engineered CRISPR/Cas System. **18**, 3 (2018).
14. Kieser, T., Bibb, M. J., Buttner, M. J., Chater, K. F. & Hopwood, D. A. *Practical Streptomyces Genetics*.



- (The John Innes Foundation, 2000).
15. Fang, F. *et al.* A vector set for systematic metabolic engineering in *Saccharomyces cerevisiae*. *Yeast* **28**, 123–136 (2011).
  16. Jessop-Fabre, M. M. *et al.* EasyClone-MarkerFree: A vector toolkit for marker-less integration of genes into *Saccharomyces cerevisiae* via CRISPR-Cas9. *Biotechnol. J* **11**, 1110–1117 (2016).
  17. Geertsma, E. R. & Dutzler, R. A Versatile and Efficient High-Throughput Cloning Tool for Structural Biology. *Biochemistry* **50**, 3272–3278 (2011).
